1 **Title:**

2 Transcriptomics of monarch butterflies (*Danaus plexippus*) reveals strong differential gene  
3 expression in response to host plant toxicity, but weak response to parasite infection

4

5 **Short running title:** host plants drive butterfly gene expression

6

7 Wen-Hao Tan<sup>1#</sup>, Tarik Acevedo<sup>1,2</sup>, Erica V. Harris<sup>1</sup>, Tiffanie Y. Alcaide<sup>1,2</sup>, James R. Walters<sup>3</sup>,

8 Mark D. Hunter<sup>4</sup>, Nicole M. Gerardo<sup>1</sup>, Jacobus C. de Roode<sup>1</sup>

9

10 <sup>1</sup>Department of Biology, Emory University, Atlanta, Georgia, 30322, USA.

11 <sup>2</sup>Department of Ecosystem Science and Management, Pennsylvania State University, State  
12 College, Pennsylvania, USA.

13 <sup>3</sup>Department of Ecology and Evolutionary Biology, University of Kansas, Lawrence, Kansas,  
14 USA.

15 <sup>4</sup>Department of Ecology & Evolutionary Biology, University of Michigan, Ann Arbor, Michigan,  
16 USA.

17

18 <sup>#</sup>Corresponding author: Wen-Hao Tan ([wenhaotan2143@gmail.com](mailto:wenhaotan2143@gmail.com))

19

20 **ABSTRACT**

21 Herbivorous insects have evolved many mechanisms to overcome plant chemical defenses,  
22 including detoxification and sequestration. Herbivores may also use toxic plants to reduce parasite

23 infection. Plant toxins could directly interfere with parasites or could enhance endogenous  
24 immunity. Alternatively, plant toxins could favor down-regulation of endogenous immunity by  
25 providing an alternative (exogenous) defense against parasitism. However, studies on genome-  
26 wide transcriptomic responses to plant defenses and the interplay between host plant toxicity and  
27 parasite infection remain rare. Monarch butterflies (*Danaus plexippus*) are specialist herbivores  
28 that feed on milkweeds (*Asclepias* spp.), which contain toxic cardenolides. Monarchs have adapted  
29 to cardenolides through multiple resistance mechanisms and can sequester cardenolides to defend  
30 against bird predators. In addition, high-cardenolide milkweeds confer medicinal effects to  
31 monarchs against a specialist protozoan parasite (*Ophryocystis elektroscirrha*). We used this  
32 system to study the interplay between the effects of plant toxicity and parasite infection on global  
33 gene expression. Our results demonstrate that monarch larvae differentially express several  
34 hundred genes when feeding on *A. curassavica* and *A. incarnata*, two species that are similar in  
35 nutritional content but differ substantially in cardenolide concentrations. These differentially  
36 expressed genes include genes within multiple families of canonical insect detoxification genes,  
37 suggesting that they play a role in monarch toxin resistance and sequestration. Interestingly, we  
38 found little transcriptional response to infection. However, parasite growth was reduced in  
39 monarchs reared on *A. curassavica*, and in these monarchs, a small number of immune genes were  
40 down-regulated, consistent with the hypothesis that medicinal plants can reduce reliance on  
41 endogenous immunity.

42

43 **Keywords:** RNAseq, secondary metabolites, cardenolides, immunity, *Asclepias*, Lepidoptera

44

## 45 1 INTRODUCTION

46 Plants and herbivorous insects have often been used for studying coevolutionary arms races  
47 within the framework of chemical ecology (Rosenthal & Berenbaum, 1991). Plants have evolved  
48 many forms of defense against herbivores, such as the production of toxic secondary chemicals,  
49 and herbivorous insects have evolved mechanisms to overcome such plant defenses (Schoonhoven,  
50 van Loon, & Dicke, 2005). These mechanisms include contact avoidance, rapid excretion,  
51 sequestration, enzymatic detoxification, and target site mutation (Després, David, & Gallet, 2007).  
52 Because host plants species vary in their secondary chemicals, herbivorous insects often utilize  
53 different mechanisms when feeding on different plants. For instance, milkweed aphids (*Aphid nerii*)  
54 differentially express several canonical insect detoxification genes, including genes encoding  
55 Cytochrome P450s (CYP450s), UDP glucuronosyltransferases (UGTs), ATP-binding cassette  
56 transporters (ABC transporters), and Glutathione S-transferases (GSTs), when feeding on  
57 milkweed species that differ in toxicity (Birnbaum, Rinker, Gerardo, & Abbot, 2017). *Heliconius*  
58 *melpomene* also differentially express UGTs and GSTs when feeding on *Passiflora* species that  
59 differ in cyanogen content (Yu, Fang, Zhang, & Jiggins, 2016). Herbivorous insects that feed on  
60 widely differing plant families have the additional complication that they may encounter an  
61 expanded range of phytochemicals, favoring plastic responses. Indeed, previous work has shown  
62 that the Swedish comma butterfly (*Polygonia c-album*) differentially expresses digestion- and  
63 detoxification-related genes, as well as genes encoding membrane transporters and cuticular  
64 proteins, when feeding on different host plant families (Celorio-Mancera et al., 2013).

65 While the ability to avoid, resist or excrete toxic chemicals has been selected in many taxa,  
66 many insects have also evolved the ability to sequester secondary chemicals into their own tissues,

67 thereby protecting themselves against their own natural enemies (Opitz & Müller, 2009). For  
68 example, in Lepidoptera (reviewed in Nishida, 2002), some swallowtail butterflies sequester  
69 aristolochic acid from their host plants to deter vertebrate predators (Uésugi, 2010); buckeye  
70 butterflies (*Junonia coenia*) sequester iridoid glycosides (IGs), which deter invertebrate predators  
71 (Dyer & Bowers, 1996; Theodoratus & Bowers, 1999); and tiger moths (*Grammia incorrupta*)  
72 sequester pyrrolizidine alkaloids, which defend them against parasitoids (Singer, Mace, & Bernays,  
73 2009). In addition to the direct effects of sequestered chemicals on anti-predator and –parasite  
74 defense, phytochemicals can also indirectly affect parasites by modulating the host immune system  
75 (Lampert, 2012). Depending on the particular chemicals and parasites, toxin sequestration may  
76 reduce, enhance, or have no effect on anti-parasite immunity. For instance, all three scenarios have  
77 been shown in herbivores that sequester IGs. *Junonia coenia* exhibits reduced immunity (measured  
78 by the melanization response) when feeding on *Plantago lanceolata*, a plant species with greater  
79 concentrations of IGs, than when feeding on *P. major*, a less toxic host plant (Smilanich, Dyer,  
80 Chambers, & Bowers, 2009). In contrast, in this same system, feeding on the more toxic plant  
81 enhances anti-viral defenses (Smilanich et al., 2017). *Melitaea cinxia* shows enhanced immunity  
82 when feeding on *Plantago lanceolata* strains with higher IG concentration (Laurentz et al., 2012),  
83 but in *Grammia incorrupta*, a moth species that also feeds on IG-containing plants, IG  
84 concentration does not appear to affect immune responses (Smilanich, Vargas, Dyer, & Bowers,  
85 2011).

86 As described above, phytochemicals pose both challenges and benefits for herbivorous insects,  
87 and the ecological interactions and evolutionary relationships between plants and herbivorous  
88 insects have been studied extensively. However, studies of genome-wide transcriptomic responses  
89 to plant defenses, which provide insight into the simultaneous effects of toxins on detoxification,

90 sequestration, and immune systems, remain rare (Celorio-Mancera et al., 2013; Vogel, Musser, &  
91 Celorio-Mancera, 2014). Even for herbivorous insect species with genomic and transcriptomic  
92 information available, transcriptomic research has rarely focused on herbivore-plant interactions  
93 (Vogel et al., 2014).

94 Here, we provide a transcriptomics-based analysis of parasite-infected and –uninfected  
95 monarch butterflies (*Danaus plexippus*) feeding on different host plant species. Monarch butterflies  
96 are a prominent example of sequestration and aposematism (Agrawal, Petschenka, Bingham,  
97 Weber, & Rasmann, 2012). Monarchs are specialist herbivores on milkweeds (mostly *Asclepias*  
98 spp.), but these plants vary widely in their toxicity, measured predominantly as the concentration  
99 and composition of cardenolides (Agrawal et al., 2012). Cardenolides are steroids that are toxic to  
100 most animals because they inhibit the essential enzyme  $\text{Na}^+/\text{K}^+$ -ATPase that is responsible for  
101 maintaining membrane potentials (Agrawal et al., 2012). Monarchs and other herbivorous insects  
102 specializing on cardenolide-containing plants have convergently evolved amino acid substitutions  
103 on the target site of the toxins that decrease binding affinity (Dobler, Dalla, Wagschal, & Agrawal,  
104 2012; Zhen, Aardema, Medina, Schumer, & Andolfatto, 2012). Target site insensitivity largely  
105 enhances monarch resistance to cardenolides, but they are not completely resistant to cardenolides  
106 (Agrawal et al., 2012; Petschenka, Offe, & Dobler, 2012). There are fitness costs, including reduced  
107 larval survival and adult lifespan, for monarchs feeding on milkweed species with high cardenolide  
108 concentration or toxicity (Agrawal, 2005; Malcolm, 1994; Tao, Hoang, Hunter, & de Roode, 2016;  
109 Zalucki, Brower, & Alonso-M, 2001; Zalucki, Brower, & Malcolm, 1990; Zalucki & Brower, 1992).  
110 Despite these costs, monarchs have evolved the ability to sequester cardenolides into their own  
111 tissues, which, coupled with bright warning coloration, deters bird predators (Brower, Ryerson,  
112 Coppinger, & Susan, 1968). In addition to the anti-predator protection provided by milkweeds,

113 high-cardenolide milkweeds also provide protection against the common specialist parasite  
114 *Ophryocystis elektroscirrha* (de Roode, Pedersen, Hunter, & Altizer, 2008; Sternberg et al., 2012).  
115 Monarchs become infected with this parasite during their larval stage when ingesting parasite  
116 spores (Mclaughlin & Myers, 1970), but feeding on milkweeds with greater concentrations of  
117 cardenolides results in lower parasite infection, growth and virulence (de Roode, Pedersen, et al.,  
118 2008; de Roode, Rarick, Mongue, Gerardo, & Hunter, 2011; Gowler, Leon, Hunter, & de Roode,  
119 2015; Lefèvre, Oliver, Hunter, & de Roode, 2010; Sternberg, de Roode, & Hunter, 2015; Sternberg  
120 et al., 2012; Tan, Tao, Hoang, Hunter, & de Roode, 2018; Tao, Gowler, Ahmad, Hunter, & de Roode,  
121 2015; Tao, Hoang, et al., 2016). At present, however, it remains unclear how cardenolides, parasites,  
122 and the monarch's immune system interact. On the one hand, it is possible that cardenolides  
123 directly interfere with parasites. This could result in a down-regulation of immune responses, as  
124 these chemicals would fulfill the same role as anti-parasitic immunity. Alternatively, cardenolides  
125 could stimulate the monarch immune system and thus enhance immune responses against parasites.  
126 Therefore, monarchs provide an excellent model to study how detoxification, toxin sequestration,  
127 and immunity interact in a system with a known association between phytochemicals and disease  
128 resistance.

129 In this study, we assess differential gene expression between monarch larvae feeding on the  
130 low-cardenolide *A. incarnata* and the high-cardenolide *A. curassavica* when infected or uninfected  
131 with the specialist parasite *O. elektroscirrha*. Specifically, we performed RNA-Seq on two tissue  
132 types of parasite-infected and uninfected larvae fed with either plant species. In addition, we  
133 quantified parasite resistance of the same batch of larvae and measured foliar cardenolide  
134 concentration in the same batch of milkweeds. While we found a limited transcriptional response  
135 to parasite infection, our results reveal a large number of genes that are differentially expressed in

136 monarchs reared on the two milkweed species, including the down-regulation of four immune  
137 genes when fed on the high-cardenolide *A. curassavica*.

138

## 139 **2 MATERIALS AND METHODS**

### 140 **2.1 Monarchs, milkweeds, and parasites**

141 Monarch butterflies in this study were obtained from a lab-reared, outcrossed lineage  
142 generated from wild-caught migratory monarchs collected in St. Marks, Florida, USA. The parasite  
143 clone (C<sub>1</sub>-E<sub>25</sub>-P<sub>3</sub>) was isolated from an infected, wild-caught monarch from the same population.  
144 We used two species of milkweed in this study: *A. incarnata* and *A. curassavica*.

145 These two species were chosen because they are similar in nutrient content but differ  
146 substantially in their level of cardenolides (toxic, secondary compounds)(Tao, Ahmad, de Roode,  
147 & Hunter, 2016); concentrations in *A. curassavica* are generally at least 10-fold higher than are  
148 those in *A. incarnata*. As a consequence, the milkweeds have been shown repeatedly to  
149 differentially affect monarch resistance to parasitism, with *A. curassavica* reducing parasite  
150 infection, growth, and virulence relative to *A. incarnata* (de Roode, Pedersen, et al., 2008; de Roode  
151 et al., 2011; Lefèvre et al., 2010; Sternberg et al., 2015, 2012; Tao et al., 2015; Tao, Hoang, et al.,  
152 2016). Milkweed seeds were obtained from Prairie Moon Nursery (Winona, MN, USA). All  
153 milkweeds in this study were grown in a greenhouse under natural light conditions with weekly  
154 fertilization (Jack's 20-10-20 from JR Peters Inc. Allentown, PA, USA).

155

### 156 **2.2 Experimental design and sample collection**

157 We used second instar larvae for transcriptome sequencing because larvae most likely become

158 infected with *O. elektroscirra* during early instars under natural conditions, through either vertical  
159 or horizontal transmissions (Altizer, Oberhauser, & Geurts, 2004; de Roode, Chi, Rarick, & Altizer,  
160 2009). We could not use first instars due to size limitations. Also, second instar larvae sequester  
161 the highest amounts of cardenolides relative to their body mass (Jones, Peschenka, Flacht, &  
162 Agrawal, 2019). Upon hatching, we reared larvae individually in Petri dishes on cuttings from  
163 different plants of either *A. incarnata* or *A. curassavica*. We inoculated second instar larvae by  
164 adding ten parasite spores to an 8-mm diameter leaf disk taken from the milkweed species upon  
165 which they had been feeding, following an established protocol (de Roode, Yates, Altizer, & Roode,  
166 2008). Uninfected controls received leaf disks without spores. After larvae consumed their entire  
167 leaf disk, they were provided leaves of the same milkweed species *ad libitum*. Eighteen to twenty-  
168 four hours after parasite inoculation, we placed larvae in RNAlater and stored them at 4°C. We  
169 dissected all larvae within four days of collection. We separated the entire digestive tract (hereafter,  
170 gut) and the remaining body (hereafter, body) and put the samples into separate tubes with  
171 RNAlater. We stored these samples at -80 °C. Sample sizes for each treatment group and tissue  
172 type are provided in supplemental information Table S1.

173 We reared another subset of parasite-infected and uninfected larvae to adulthood on each plant  
174 species to quantify parasite resistance (N = 9-17 per treatment group). After parasite inoculation,  
175 larvae were transferred to individual rearing cups (473 mL) and fed leaves from either *A.*  
176 *curassavica* or *A. incarnata*. After pupation, pupae were placed in a laboratory room maintained at  
177 25 °C under 14/10h L/D cycle. After eclosion, adults were placed in 8.9 x 8.9 cm glassine envelopes  
178 without a food source at 12 °C under 14/10h L/D cycle. Parasite load was quantified using a  
179 vortexing protocol described in de Roode et al., 2008. Normality and variance homogeneity were  
180 checked with the Shapiro-Wilk normality test and Fligner-Killeen test. Parasite spore load data



181 were analyzed using a two-sample t-test. All analyses were performed in R version 3.5.2 (R Core  
182 Team, 2018).

183

### 184 **2.3 Chemical analyses**

185 We collected two types of samples for chemical analyses: milkweed foliage and larval frass.  
186 We collected foliage samples to confirm the differences in total cardenolide concentration between  
187 the two species. In addition, we collected larval frass to compare the differences between  
188 cardenolide composition before and after larval digestion. Foliage samples of the two plant species  
189 (N = 11-12 individual plants per species) were collected on the same day that we performed parasite  
190 inoculations. One leaf from the fourth leaf pair on each plant was chosen. Six leaf disks (424 mm<sup>2</sup>  
191 total) were taken with a paper hole punch from one side of the leaf and placed immediately into a  
192 1 mL collection tube with cold methanol. Another six identical leaf disks were taken from the  
193 opposite side of the same leaf to measure sample dry mass. Frass samples, each from an individual  
194 larva, were collected from another subset of second instar larvae that were reared from hatchlings  
195 on *A. curassavica* (N = 17). For this analysis, we focused on *A. curassavica* only because *A.*  
196 *incarnata* foliage contains very few cardenolides. Frass samples for each individual were collected  
197 for 24 hours during the second instar. Frass samples were collected into 1 mL collection tubes with  
198 cold methanol on the day of frass production. Total cardenolide concentrations and cardenolide  
199 compositions were analyzed using reverse-phase ultra-performance liquid chromatography (UPLC;  
200 Waters Inc., Milford, MA, USA) following established methods (Tao et al., 2015). The absorbance  
201 spectra were recorded from 200 to 300 nm with digitoxin used as an internal standard. Under  
202 reverse-phase UPLC, cardenolide retention time decreases as polarity increases. For the plant  
203 samples, we analyzed the difference in total cardenolide concentration between the two species.

204 Normality and variance homogeneity were checked with the Shapiro-Wilk normality test and  
205 Fligner-Killeen test. Cardenolide data were analyzed using a Mann–Whitney U test due to violation  
206 of assumptions of normality and variance homogeneity. All analyses were performed in R version  
207 3.5.2 (R Core Team, 2018). We assessed the differences in cardenolide compositions by comparing  
208 the cardenolide peaks between the two sample types.

209

## 210 **2.4 RNA extraction, library preparation, and sequencing**

211 We extracted total RNA from either gut or body tissues using the RNeasy RNA mini extraction  
212 kit (Qiagen) following the manufacturer’s protocol. The quality and quantity of RNA samples were  
213 assessed using a nanodrop and bioanalyzer. Total RNA was sent to BGI (Beijing Genomics Institute,  
214 Hong Kong) for library preparation and sequencing. We sequenced the two tissue types (gut and  
215 body separately) of infected and uninfected larvae fed with either *A. incarnata* or *A. curassavica*,  
216 with 3-4 biological replicates per treatment (see supplemental information Table S1). We  
217 performed 50 bp single-end sequencing with a sequencing depth of 20M reads per sample using  
218 the BGISEQ-500 platform.

219

## 220 **2.5 Transcriptome assembly**

221 We checked the quality of RNA-seq reads using FastQC (Andrews, 2010) and compiled across  
222 samples using MultiQC (Ewels, Magnusson, Lundin, & Källner, 2016). Sequence quality was  
223 consistently high across positions (see supplemental information Fig. S1), so we proceeded without  
224 trimming. RNA-seq reads for each sample were mapped to the monarch reference genome (Zhan,  
225 Merlin, Boore, & Reppert, 2011) using STAR ver 2.5.2b (Dobin et al., 2013) and checked for  
226 alignment statistics. There were two samples that had low quality; one of them had a very low

227 quantity of reads and the other had a very low mapping rate. Given that these two samples were  
228 from different individuals, we removed four samples (i.e., both tissue types of the same individual)  
229 from our analyses. We obtained the number of reads mapped to each gene from STAR and compiled  
230 them across samples as a count matrix.

231

## 232 **2.6 Differential gene expression analysis**

233 Differential gene expression analysis was performed using the R Bioconductor package edgeR  
234 version 3.24.3 (Robinson, McCarthy, & Smyth, 2009). We performed separate analyses on the two  
235 tissue types. We removed genes without any counts across samples from our analyses. We  
236 normalized the library sizes across samples using the trimmed mean of M-values (TMM)  
237 normalization. We performed differential gene expression analyses using negative binomial  
238 generalized linear models (GLMs). We created design matrices for GLM with infection treatment  
239 and plant species as factors, estimated dispersion parameters, and fitted the models. We addressed  
240 specific questions of interest by setting coefficient contrasts to compare between different treatment  
241 groups. First, we compared gene expression between all infected and all uninfected larvae to  
242 examine the overall impacts of parasite infection. We then compared gene expression between  
243 infected and uninfected larvae reared on the two milkweeds species separately to examine plant-  
244 specific effects. Next, we compared gene expression between larvae fed with *A. incarnata* and *A.*  
245 *curassavica*; given that we found almost no differences between infected and uninfected groups,  
246 we combined them for this comparison. The Benjamini-Hochberg method (Benjamini & Hochberg,  
247 1995) was used to account for multiple hypothesis testing and to calculate adjusted p-values. We  
248 visualized the results through heatmaps with hierarchical clustering, MA plots, and volcano plots  
249 generated using the R package edgeR version 3.24.3 (Robinson et al., 2009) and gplots version

250 3.0.1 (Warnes et al., 2016). All analyses were performed in R version 3.5.2 (R Core Team, 2018).

251

## 252 **2.7 Examine specific gene sets of interest**

253       Given that we were specifically interested in genes that function in immunity and  
254 detoxification, we examined if canonical immune genes and detoxification genes were  
255 differentially expressed among treatment groups. We obtained a full set of annotated monarch  
256 immune genes published by the *Heliconius* Genome Consortium (2012), which included a set of  
257 annotated (*Heliconius*) immune genes and their orthologs in several species, including monarchs.  
258 The monarch orthologs listed in this published dataset were based on a previous version of monarch  
259 genome annotation (OGS1.0), so we updated this full set of immune genes to the latest version of  
260 gene annotation (OGS2.0) using information provided in Monarch Base (Zhan & Reppert, 2013).  
261 This updated monarch immune gene set contains 114 genes belonging to the functional classes of  
262 recognition, signaling, modulation, and effector (see supplemental information Table S2). For  
263 detoxification genes, similar to a previous study on another milkweed-feeding insect (Birnbaum et  
264 al., 2017), we focused on four canonical gene families: Cytochrome P450s (CYP450s), UDP  
265 glucuronosyltransferases (UGTs), ATP-binding cassette transporters (ABC transporters), and  
266 Glutathione S-transferases (GSTs). We obtained those annotated detoxification genes from  
267 Monarch Base (Zhan & Reppert, 2013). We examined each set of our significantly differentially  
268 expressed genes to obtain the number of immune and detoxification genes within them. For all the  
269 significantly differentially expressed detoxification genes, we performed BLAST searches against  
270 two other Lepidopteran species (*Bombyx mori* and *Heliconius melpomene*) via the  
271 EnsemblMetazoa database (<https://metazoa.ensembl.org/>) to verify that their top hit paralogs also  
272 have the same putative detoxification function.

273

## 274 **2.8 Gene ontology enrichment analysis**

275 Functional annotations and Gene Ontology (GO) term assignments for all protein-coding  
276 genes in the genome were generated using PANNZER2 (Törönen, Medlar, & Holm, 2018), with  
277 protein sequences obtained from Monarch Base, using default parameters. We created a custom  
278 annotation package for our organism using AnnotationForge (Carlson & Pages, 2018). We  
279 performed GO-term enrichment analyses on differentially expressed genes using ClusterProfiler  
280 (Yu, Wang, Han, & He, 2012) with default p-value and q-value cutoff thresholds. The “gene  
281 universe” included all genes that were expressed in our RNA-Seq dataset. The Benjamini-  
282 Hochberg method (Benjamini & Hochberg, 1995) was used to account for multiple hypothesis  
283 testing and to calculate the adjusted p-values. We included all three ontology groups in our analyses:  
284 biological process (BP), molecular function (MF), and cellular components (CC). We visualized  
285 the enrichment results by dotplots using ClusterProfiler (Yu et al., 2012)

286

## 287 **3 RESULTS**

288

### 289 **3.1 Plant chemistry and parasite resistance**

290 We confirmed previous findings that the two milkweed species differ greatly in cardenolide  
291 concentration and differentially affect monarch resistance to parasitism. Total cardenolide  
292 concentration of *A. curassavica* foliage was 95-fold higher than that of *A. incarnata* foliage (Fig.  
293 1A;  $W = 0$ ,  $P < 0.0001$ ), and butterflies reared on *A. curassavica* experienced significantly lower  
294 parasite spore load than those fed with *A. incarnata* (Fig. 1B;  $t = 3.39$ ,  $df = 19$ ,  $P = 0.003$ ). None

295 of the uninoculated monarchs became infected (N = 9 for *A. incarnata* and N = 17 for *A.*  
296 *curassavica*). When comparing the cardenolide composition of *A. curassavica* foliage and the frass  
297 from larvae feeding on *A. curassavica*, we found that they differed greatly in composition (Fig. 2).  
298 Specifically, out of a total of 22 unique cardenolides (i.e., individual bars in Fig. 2), only four  
299 occurred in both foliage and frass; eight cardenolides were exclusively found in foliage, and nine  
300 were exclusively found in frass. Additionally, there were more polar cardenolides in frass than in  
301 foliage, as indicated by lower retention times relative to a digitoxin internal standard (Fig. 2).

302

### 303 **3.2 Differential gene expression analysis in relation to parasite infection**

304 We first compared gene expression between all infected and all uninfected larvae to examine  
305 the overall effects of parasite infection on gene expression. Surprisingly, in both gut and body  
306 tissues, we found that no genes were significantly differentially expressed (Fig. 3-4, Table 1). Next,  
307 we compared gene expression between infected and uninfected larvae reared on the two milkweed  
308 species separately to examine plant-specific effects. Again, we found almost no response to parasite  
309 infection (Table 1). For the larvae fed with *A. incarnata*, only one gene was significantly up-  
310 regulated in the gut in the infected group when compared to the uninfected group: a cytochrome  
311 P450 gene (DPOGS205609). For the larvae fed with *A. curassavica*, only two genes were  
312 significantly down-regulated in the body in the infected group: an acid digestive lipase  
313 (DPOGS211626) and a carboxypeptidase (DPOGS211663). Overall, we found extremely few  
314 differentially expressed genes between infected and uninfected larvae regardless of tissue type or  
315 host plant, and none of those that were significantly differentially expressed were canonical  
316 immune genes.

317

### 318 **3.3 Differential gene expression analysis in relation to milkweed diet**

319 We compared gene expression between larvae reared on *A. curassavica* and *A. incarnata*.  
320 Given that we found almost no differences in expression between infected and uninfected larvae,  
321 we combined them in this comparison between plant species. We found that 908 genes were  
322 differentially expressed in the gut and 428 genes were differentially expressed in the body (Fig. 3-  
323 4, Table 1). Given that the gut is the place where initial digestion of plant matter happens, we  
324 expected the transcriptional patterns to be more distinct between plant diets in gut than in body  
325 samples. Indeed, heatmap and hierarchical clustering suggest that individuals are more clustered  
326 by plant diet in gut samples than in body samples (Fig. 5). The top 15 up-regulated and top 15  
327 down-regulated genes for the gut and body are listed in Table 2 and Table 3, respectively. In gut  
328 tissues, notably, one of the top 15 up-regulated genes when fed with *A. curassavica* is a glutathione  
329 S-transferase (DPOGS210488), and another one is a carboxyl esterase (DPOGS204275), both of  
330 which are canonical insect detoxification genes and possibly might function in processing  
331 cardenolides. Other genes belong to a variety of biological functions, such as digestive processes  
332 and membrane-related proteins. Differential expression of digestive and membrane-related genes  
333 has also been demonstrated in other insects when feeding on different plant species (Celorio-  
334 Mancera et al., 2013).

335 In the body samples, three canonical detoxification genes were up-regulated when fed with *A.*  
336 *incarnata*, including one UDP-glycosyltransferase (DPOGS209528) and two cytochrome P450s  
337 (DPOGS207643 and DPOGS213243). In addition, the top 15 up-regulated genes also include a  
338 cytochrome b5 (DPOGS210599), which is a redox partner to cytochrome P450 in the P450 system  
339 (Després et al., 2007). Five of the top 15 up-regulated genes when fed with *A. curassavica* encode  
340 cuticular proteins. Interestingly, cuticle proteins have also been found to be differentially expressed

341 in other insects when feeding on different host plants (*e.g.*, Birnbaum et al., 2017; Celorio-Mancera  
342 et al., 2013). Many of the remaining top differentially expressed genes (43.3% in gut and 30.0% in  
343 body) have unknown functions.

344

### 345 **3.4 Examination of specific gene sets**

346 Given existing evidence from other herbivore systems mentioned previously (Smilanich et al.,  
347 2009) and our hypothesis that host plants affect immune gene expression, we examined whether  
348 any of the known canonical insect immune genes were differentially expressed when feeding on  
349 different milkweed species. Among the full set of differentially expressed genes between larvae  
350 fed *A. curassavica* and *A. incarnata*, we found that only four immune genes were significantly  
351 differentially expressed in gut tissue and only one immune gene was differentially expressed in  
352 whole-body tissue (Table 4). For the four differentially expressed immune genes associated with  
353 gut samples, two of them are CLIP serine proteases, one is a frep-like receptor, and the other one  
354 is a Toll-like receptor. The one differentially expressed gene associated with body samples is a  
355 CLIP serine protease that was also differentially expressed in the gut. Interestingly, all four of them  
356 were down-regulated in caterpillars fed *A. curassavica*, the more toxic species on which parasite  
357 growth was reduced. Overall, we did not find any support that more toxic milkweeds (*i.e.*, *A.*  
358 *curassavica*) enhance the immunity of monarch larvae. Instead, we found weak support that  
359 feeding on more toxic milkweeds might cause down-regulation of a subset of immune genes.

360 Next, given that monarch larvae were fed with two milkweed species that differ greatly in  
361 toxicity, we examined whether any of the known canonical insect detoxification genes were  
362 differentially expressed when feeding on the two milkweed species. We focused on gut tissues here  
363 because the gut is the place of primary contact with plant materials, where initial digestion and



364 detoxification take place, and because we found stronger differential expression in gut than body  
365 tissues. We found that a large proportion of known detoxification genes were expressed (Table 5).  
366 Moreover, the proportion of detoxification genes within all significantly differentially expressed  
367 genes (2.42%) was significantly higher than the proportion of all annotated genes in the genome  
368 that are detoxification genes (1.35%) ( $\chi^2 = 6.12$ ,  $df = 1$ ,  $P = 0.013$ ), suggesting that they are  
369 overrepresented in the genes differentially expressed in monarchs reared on different milkweeds.  
370 The direction of differential expression was not universal, with some genes being up-regulated  
371 when on the toxic *A. curassavica* and others when on the less toxic *A. incarnata*. Specifically,  
372 6 CYP450s, 2 UGTs, and 1 GST were up-regulated in monarchs fed *A. curassavica*, while 3  
373 CYP450s, 1 UGTs, 8 ABC transporters, and 1 GST were up-regulated in monarchs fed *A. incarnata*  
374 (Table 5 and Supplementary Table S3). Interestingly, all of the ABC transporters were only  
375 significantly up-regulated in monarchs fed with *A. incarnata*. Overall, our results demonstrate that  
376 several canonical detoxification genes were differentially expressed when larvae fed on the two  
377 milkweeds species with different levels of toxicity, suggesting that these genes are involved in  
378 metabolizing secondary compounds.

379

### 380 **3.5 Gene ontology enrichment analysis**

381 Given that there were almost no differentially expressed genes across infection treatments, we  
382 only performed GO enrichment analysis on differentially expressed genes between larvae fed with  
383 different plant species. We performed separate analyses for significantly up-regulated genes in  
384 larvae fed with *A. curassavica* and significantly up-regulated genes in larvae fed with *A. incarnata*  
385 in the two tissue types. Among up-regulated genes in larvae reared on *A. curassavica*, we found a

386 total of 19 GO terms significantly enriched in the gut tissue and one GO term significantly enriched  
387 in the body. Among up-regulated genes in *A. incarnata*-reared larvae, we found a total of 112 GO  
388 terms significantly enriched in the gut tissue and 6 GO terms significantly enriched in the body  
389 (Table 6). Significantly enriched GO terms for each group are shown in Fig. 6 & 7. Overall, we  
390 found many more significantly enriched GO terms in gut tissue than in body, and in larvae fed with  
391 *A. incarnata*. However, none of those GO terms have seemingly direct functional relevance to  
392 detoxification or immunity.

393

#### 394 **4 DISCUSSION**

395 This study examined differences in transcriptional profiles between monarch butterfly larvae  
396 feeding on two milkweed species and in response to infection by a specialist protozoan parasite.  
397 Our results demonstrate that hundreds of genes were differentially expressed in gut and body when  
398 feeding on two different milkweed species. Given that these two milkweed species differ greatly  
399 in their concentrations of secondary chemicals (cardenolides) (Fig. 1A) but little in nutrient  
400 composition (Tao, Ahmad, et al., 2016), these transcriptional differences are likely related to coping  
401 with different levels of toxicity in the diet. Consistent with this hypothesis, we found that several  
402 canonical insect detoxification genes were differentially expressed in monarchs reared on the two  
403 milkweed species. We discovered that many more genes were differentially expressed in gut than  
404 body tissue and that transcriptional profiles of gut samples formed more defined clusters,  
405 suggesting that transcriptional responses in relation to milkweed diet are stronger in the gut than in  
406 the rest of the body. We also found four canonical immune genes that were differentially expressed  
407 between individuals fed on different milkweed species. Interestingly, all four immune genes were

408 down-regulated in monarchs reared on *A. curassavica*, the plant species that reduced parasite  
409 infection. In contrast with these transcriptional responses to milkweed diet, we found few  
410 transcriptional differences between infected and uninfected monarchs.

411

#### 412 **4.1 Detoxification of plant secondary chemicals**

413 Many plants produce secondary metabolites as defense chemicals against herbivores. In  
414 response, herbivorous insects express genes that function in several protective mechanisms,  
415 including enzymatic detoxification, excretion, and sequestration (Després et al., 2007). Some  
416 previous studies have demonstrated that insects differentially express detoxification genes when  
417 feeding on plants with different levels of defense chemicals. For instance, *Drosophila mettleri*, a  
418 fruit fly species specialized on cacti with toxic alkaloids, differentially expresses several  
419 detoxification genes, including P450s, UGTs, GST, and carboxylesterases, when feeding on  
420 different food sources (Hoang, Matzkin, & Bono, 2015). *Tupiocoris notatus*, a mirid species, down-  
421 regulates several GST, UGT, and P450s when feeding on defenseless (JA-silenced) *Nicotiana*  
422 *attenuata* (Crava, Brütting, & Baldwin, 2016). Similarly, our results demonstrate differences in  
423 transcriptional profiles of monarch larvae feeding on different milkweed species. Several of those  
424 differentially expressed genes belong to canonical detoxification genes, including P450s, UGTs,  
425 GSTs, and ABC transporters. Detoxification-related categories, however, were not significantly  
426 enriched in our enrichment analyses. While the majority of detoxification genes were expressed,  
427 only a relatively small proportion of them were differentially expressed between monarchs reared  
428 on the different plant species. Taken together, these results suggest that although a large number of  
429 detoxification genes are required for metabolizing a toxic plant diet, only a relatively small  
430 proportion of them are related to dealing with variable levels of toxicity. Although our significantly

431 enriched expression categories are not related to detoxification, many of them have also been  
432 reported in other studies of herbivorous insects. For instance, categories related to membrane,  
433 cuticle, and ribosome are significantly enriched in *Polygonia c-album* when feeding on different  
434 plant species (Celorio-Mancera et al., 2013). Enrichment of cuticle-related and developmental-  
435 related genes when feeding on different host plants has also been reported in milkweed aphids  
436 (Birnbaum et al., 2017) and in several other herbivorous insects (Hoang et al., 2015; Mathers et al.,  
437 2017; Matzkin, 2012; Schweizer, Heidel-Fischer, Vogel, & Reymond, 2017; Zhong, Li, Chen,  
438 Zhang, & Li, 2017), suggesting that those genes might have pleiotropic effects on detoxification  
439 processes, or might be important for structuring of gut tissues. Thickening cuticular components  
440 has been suggested to reduce the penetration of insecticides, facilitating insecticide resistance  
441 (Foster et al., 2010). Alternatively, as certain insecticides are known to inhibit chitin synthesis  
442 (Leighton, Marks, & Leighton, 1981), it is possible that insects regulate the transcription of cuticle-  
443 related genes to deal with the interference of plant toxins on chitin metabolism and cuticular protein  
444 interactions (Celorio-Mancera et al., 2013).

445 CYP450 is one of the largest gene families in insects and catalyzes a wide range of reactions  
446 (Werck-Reichhart & Feyereisen, 2000). In many insects (e.g., black swallowtail (*Papilio polyxenes*)  
447 and parsnip webworm (*Depressaria pastinacella*)), the monooxygenase activity of P450s plays an  
448 important role in metabolizing plant toxins such as furanocoumarins (Mao, Rupasinghe, Zangerl,  
449 Schuler, & Berenbaum, 2006; Schuler, 1996; Wen, Pan, Berenbaum, & Schuler, 2003).  
450 Cardenolides are also substrates for CYP450 monooxygenases (Marty & Krieger, 1984), and it is  
451 assumed that milkweed-feeding insects metabolize cardenolides during the detoxification process  
452 (Agrawal et al., 2012). Our results indicate that many CYP450 genes are expressed and some of  
453 them are differentially expressed when feeding on milkweeds with different levels of cardenolides,

454 suggesting that they play a role in detoxifying cardenolides. Furthermore, our chemical analyses  
455 comparing foliage and frass cardenolide composition identified specific cardenolides in frass that  
456 are not present in foliage, including several with high polarity. This result, consistent with a recent  
457 study (Jones et al., 2019), suggests that some of the cardenolides excreted via frass are likely  
458 modified forms, created through detoxification processes. Thus, CYP450 genes may play a role in  
459 this modulation, but future studies are needed to directly examine their function.

460

#### 461 **4.2 Specialization on cardenolide-containing plants and sequestration of cardenolides**

462 Despite the fact that milkweed-feeding insects have been one of the most studied systems in  
463 chemical ecology and plant-insect interactions, to our knowledge, very few studies have  
464 characterized global transcriptional responses of specialist insects when feeding on milkweeds.  
465 Recently, Birnbaum et. al. (2017) compared transcriptional profiles using both RNA-seq and qPCR  
466 of milkweed aphids (*Aphid nerii*) fed on three different milkweed species, including the plant  
467 species used in our study. Similar to our study, they found differential expression of canonical  
468 insect detoxification genes, including genes belonging to CYP450s, UGTs, GSTs, and ABC  
469 transporters. In addition, their findings and our results both indicate that a greater number of genes  
470 are down-regulated rather than up-regulated when milkweed-specialized insects feed on more toxic  
471 plant species (Table 1)(Birnbaum et al., 2017). Although both studies on milkweed-feeding insects  
472 showed similar results, milkweed aphids do not have the target site mutations on Na<sup>+</sup>/K<sup>+</sup>-ATPase  
473 that confer resistance to cardenolides in monarchs (Zhen et al., 2012), suggesting that they rely on  
474 other mechanisms to cope with cardenolides. A previous study across three milkweed-feeding  
475 butterflies that differ in target site sensitivity indicated that resistance conferred by target site  
476 insensitivity has a stronger association with sequestering cardenolides than with digesting

477 cardenolide-rich diets (Petschenka & Agrawal, 2015). Therefore, since the two species differ in  
478 target site sensitivity but exhibit similar transcriptional responses to feeding on more toxic plants,  
479 the differentially expressed genes may be important in sequestration processes, as both species  
480 sequester cardenolides as a defense against predators (Rosenthal & Berenbaum, 1991).

481 Previous studies have demonstrated that monarch larvae can regulate the level of cardenolide  
482 sequestration, as indicated by the fact that cardenolide concentration in larval hemolymph and  
483 milkweed leaves do not show a linear relationship (Rosenthal & Berenbaum, 1991). Interestingly,  
484 monarchs concentrate cardenolides when feeding on low-cardenolide plants and sequester less  
485 when feeding on plants with a very high concentration of cardenolides (Jones et al., 2019; Malcolm,  
486 1991). Notably, our results show that all the differentially expressed ABC transporters were up-  
487 regulated in larvae fed *A. incarnata*, a milkweed species with very low cardenolide concentrations.  
488 Studies of other insect systems have shown that ABC transporters are involved in sequestration  
489 processes. For example, ABC transporters play a key role in salicin sequestration in poplar leaf  
490 beetles (*Chrysomela populi*) (Strauss, Peters, Boland, & Burse, 2013). Therefore, the up-regulation  
491 of ABC transporters when feeding on low-cardenolide milkweed might be related to an increased  
492 rate of cardenolide sequestration.

493

#### 494 **4.3 The effects of plant diet on immunity**

495 Some studies have demonstrated that plant diets with high toxicity can reduce immune  
496 responses of herbivorous insects (Smilanich et al., 2009). Detoxification and sequestration of plant  
497 toxins can be energetically costly (Bowers, 1992), so a reduction in immune function could be  
498 caused by trade-offs with these processes (Moret & Schmid-Hempel, 2000). Plant toxins may have  
499 direct negative effects on immune cells (Smilanich et al., 2009). Alternatively, insect hosts may

500 invest less in immunity when anti-parasite resistance is provided by host plants instead. In our study,  
501 although we did not find a strong overall effect of plant diet on the expression of canonical immune  
502 genes, we observed reduced expression of four immune genes in monarchs feeding on *A.*  
503 *curassavica*, the anti-parasitic plant species. This does not preclude the possibility that other  
504 monarch immune defenses not captured by gene expression differences may be influenced by host  
505 plant diet. Future studies should couple investigation of immune gene expression with studies of  
506 cellular immune responses and should strive to characterize the function of the many genes of  
507 unknown function in monarchs, some of which could play a role in anti-parasitic defense.

508 In the context of herbivore-parasite interactions, medicinal effects conferred by plant diet  
509 could be mediated by either direct or indirect effects of plant toxins on parasites. Specifically,  
510 medicinal compounds may directly interfere with parasites or may indirectly enhance disease  
511 resistance by stimulating immune responses. In the former scenario, investment in immune  
512 responses may be reduced because they are compensated for by the medicinal compounds. Indeed,  
513 recent studies have demonstrated that the use of medicinal compounds reduces immune investment  
514 in a variety of insect species. For example, honey bees (*Apis mellifera*) provided with resins, which  
515 have antimicrobial properties, exhibit reduced expression of two immune genes (Simone, Evans,  
516 & Spivak, 2009). Similarly, the presence of resins also reduces humoral immune responses in wood  
517 ants (*Formica paralugubris*) (Castella, Chapuisat, Moret, & Christe, 2008). Furthermore, long-  
518 term association with medicinal compounds might lead to relaxed selection on immune genes. The  
519 genome of honey bees (*Apis mellifera*) has a reduced number of canonical insect immune genes,  
520 possibly due to the use of medicinal compounds and behavioral defense mechanisms (Evans et al.,  
521 2006). Our results show that all four significantly differentially expressed canonical immune genes  
522 were down-regulated in monarchs fed with *A. curassavica*, which is in line with the hypothesis that

523 medicinal milkweeds lead to reduced investment in immunity.

524        Interestingly, one of the immune genes that was down-regulated in larvae feeding on *A.*  
525 *curassavica* is a FREP-like receptor (DPOGS203317). Previous studies of infection of insects by  
526 another apicomplexan parasite (*Plasmodium* in *Anopheles gambiae*), which also infects insects  
527 through the midgut wall, have shown that several fibrinogen-related proteins (FREPs) play an  
528 important role in anti-parasitic defense. For example, overexpression of FREP13 results in  
529 increased resistance to *Plasmodium* infection (Dong & Dimopoulos, 2009; Simões et al., 2017). In  
530 contrast, inactivation of FREP1 increases resistance, because FREP1 functions as an important host  
531 factor that mediates *Plasmodium* ookinete's invasion of the mosquito midgut epithelium (Dong,  
532 Simões, Marois, & Dimopoulos, 2018; Zhang et al., 2015). Our results show down-regulation of a  
533 FREP-like gene when larvae feed on a milkweed that confers stronger resistance to parasite  
534 infection. However, the exact function of this FREP-like gene remains unknown. In addition, two  
535 other immune genes that were down-regulated when feeding on *A. curassavica* are CLIP serine  
536 proteases (DPOGS215180 and DPOGS213841). CLIP serine proteases are a large gene family  
537 (Christophides et al., 2002), and some of them play an important role in anti-malaria defense  
538 (Barillas-Mury, 2007; Volz, Müller, Zdanowicz, Kafatos, & Osta, 2006). Future studies that directly  
539 examine the function of these particular immune genes are needed to understand their potential  
540 role in defense against *O. elektroscirra* infections.

541

#### 542 **4.4 Transcriptional responses in relation to parasite infection**

543        Our study confirmed previous findings that monarch larvae fed with *A. curassavica* (high-  
544 cardenolide) have stronger anti-parasite resistance than those fed with *A. incarnata* (low-  
545 cardenolide) (Fig. 1B). Nevertheless, we observed almost no transcriptional response to parasite



546 infection regardless of host plant diet. There are three possible explanations for these results. First,  
547 the parasite might be able to suppress or evade the host immune system, which has been  
548 demonstrated in several other specialist parasites (Gurung & Kanneganti, 2015; MacGregor, Szöör,  
549 Savill, & Matthews, 2012; Selkirk, Bundy, Smith, Anderson, & Maizels, 2003). Second, the  
550 infection may not induce a systemic response; the immune responses may instead have occurred  
551 locally and hence may not have been detectable when sequencing the transcriptome of the gut or  
552 body. Third, we chose a 24-hr timepoint post infection to try to capture host responses against  
553 parasites invading into the body cavity, which is the period in the infection cycle when mosquitoes  
554 exhibit up-regulation in midgut-based immune responses to apicomplexan parasites (Blumberg,  
555 Trop, Das, & Dimopoulos, 2013; Vlachou, Schlegelmilch, Christophides, & Kafatos, 2005).  
556 However, it is possible that the parasite is more active and/or has a stronger interaction with the  
557 host immune system at different stages of the infection cycle. Thus, additional life stages should  
558 be taken into consideration in future analyses.

559

## 560 **5 CONCLUSIONS**

561 We compared transcriptional profiles of monarch larvae fed two different milkweed species  
562 and examined larval transcriptional responses to infection by a specialist parasite. Our results  
563 demonstrate that monarch larvae differentially express hundreds of genes when feeding on *A.*  
564 *curassavica* or *A. incarnata*, two milkweed species that differ strongly in their secondary chemical  
565 content. Those differentially expressed genes include genes within multiple families of canonical  
566 insect detoxification genes, suggesting that play a role in processing plant diets with different levels  
567 of toxicity. Notably, all ABC transporters were up-regulated in monarchs fed with *A. incarnata*, the

568 less toxic plant, which might be related to an increased cardenolide sequestration. Interestingly, the  
569 few immune genes that were differentially expressed in monarchs reared on the two plant species  
570 were all down-regulated on the anti-parasitic *A. curassavica*, consistent with the hypothesis that  
571 medicinal plants could reduce immune investment by providing an alternative form of anti-parasite  
572 defense.

573

## 574 **ACKNOWLEDGMENTS**

575 We thank W. Palmer for providing immune gene annotation resources for *Danaus plexippus*,  
576 A. Berasategui, E. Diaz-Almeyda, H. Salem, C. Beck, S. Birnbaum, B.-W. Lo, E. Whittington, and  
577 V. Talla for helpful discussion on this research, A. Salmi and K. Baffour-Ado for help with the  
578 experiments, and H. Streit for performing the chemical analyses. Computational analyses were  
579 performed on resources provided by the University of Kansas Information and Telecommunication  
580 Technology Center. This work was supported by National Science Foundation (NSF) grant IOS-  
581 1557724 to JCdR, NMG, and MDH, NSF Graduate Research Fellowship Program DGE-1444932  
582 to EVH, and NSF grant DEB-1457758 to JRW.

## 583 REFERENCES

- 584 Agrawal, A. A. (2005). Natural selection on common milkweed (*Asclepias syriaca*) by a  
585 community of specialized insect herbivores. *Evolutionary Ecology Research*, 7(5), 651–667.  
586 doi:10.1021/ct300848z
- 587 Agrawal, A. A., Petschenka, G., Bingham, R. A., Weber, M. G., & Rasmann, S. (2012). Toxic  
588 cardenolides: chemical ecology and coevolution of specialized plant-herbivore interactions.  
589 *New Phytologist*, 194(1), 28–45. doi:10.1111/j.1469-8137.2011.04049.x
- 590 Altizer, S., Oberhauser, K. S., & Geurts, K. A. (2004). Transmission of the protozoan parasite  
591 *Ophryocystis elektroscirrha* in monarch butterfly populations: implications for prevalence  
592 and population-level impacts. In *The monarch butterfly: biology and conservation* (pp. 203–  
593 218).
- 594 Andrews, S. (2010). FastQC: a quality control tool for high throughput sequence data. Retrieved  
595 from <https://www.bioinformatics.babraham.ac.uk/projects/fastqc/>
- 596 Barillas-Mury, C. (2007). CLIP proteases and *Plasmodium* melanization in *Anopheles gambiae*.  
597 *Trends in Parasitology*, 23(7), 297–299. doi:10.1016/j.pt.2007.05.001
- 598 Benjamini, Y., & Hochberg, Y. (1995). Controlling the false discovery rate : a practical and  
599 powerful approach to multiple testing. *Journal of the Royal Statistical Society . Series B*  
600 (*Methodological* ), 57(1), 289–300.
- 601 Birnbaum, S. S., Rinker, D. C., Gerardo, N. M., & Abbot, P. (2017). Transcriptional profile and  
602 differential fitness in a specialist milkweed insect across host plants varying in toxicity.  
603 *Molecular Ecology*, 26(23), 6742–6761. doi:10.1111/mec.14401
- 604 Blumberg, B. J., Trop, S., Das, S., & Dimopoulos, G. (2013). Bacteria- and IMD pathway-  
605 independent immune defenses against *Plasmodium falciparum* in *Anopheles gambiae*. *PLoS*  
606 *ONE*, 8(9), e72130. doi:10.1371/journal.pone.0072130
- 607 Bowers, M. D. (1992). The evolution of unpalatability and the cost of chemical defense in  
608 insects. In M. B. Roitberg, B.D. & Isman (Ed.), *Insect Chemical Ecology: An Evolutionary*  
609 *Approach* (pp. 216–244). New York: Chapman & Hall.
- 610 Brower, L. P., Ryerson, W. N., Coppinger, L. L., & Susan, C. (1968). Ecological chemistry and  
611 the palatability spectrum. *Science*, 161(3848), 1349–1351.
- 612 Carlson, M., & Pages, H. (2018). AnnotationForge: code for building annotation database  
613 packages.
- 614 Castella, G., Chapuisat, M., Moret, Y., & Christe, P. (2008). The presence of conifer resin  
615 decreases the use of the immune system in wood ants. *Ecological Entomology*, 33(3), 408–  
616 412. doi:10.1111/j.1365-2311.2007.00983.x

- 617 Christophides, G. K., Zdobnov, E., Barillas-Mury, C., Birney, E., Blandin, S., Blass, C., ...  
618 Kafatos, F. C. (2002). Immunity-related genes and gene families in *Anopheles gambiae*.  
619 *Science*, 298(5591), 159–165. doi:10.1126/science.1077136
- 620 Crava, C. M., Brütting, C., & Baldwin, I. T. (2016). Transcriptome profiling reveals differential  
621 gene expression of detoxification enzymes in a hemimetabolous tobacco pest after feeding  
622 on jasmonate-silenced *Nicotiana attenuata* plants. *BMC Genomics*, 17(1), 1005.  
623 doi:10.1186/s12864-016-3348-0
- 624 Dasmahapatra, K. K., Walters, J. R., Briscoe, A. D., Davey, J. W., Whibley, A., Nadeau, N. J., ...  
625 Jiggins, C. D. (2012). Butterfly genome reveals promiscuous exchange of mimicry  
626 adaptations among species. *Nature*, 487(7405), 94–98. doi:10.1038/nature11041
- 627 de la Paz Celorio-Mancera, M., Wheat, C. W., Vogel, H., Söderlind, L., Janz, N., & Nylin, S.  
628 (2013). Mechanisms of macroevolution: Polyphagous plasticity in butterfly larvae revealed  
629 by RNA-Seq. *Molecular Ecology*, 22(19), 4884–4895. doi:10.1111/mec.12440
- 630 de Roode, J. C., Chi, J., Rarick, R. M., & Altizer, S. (2009). Strength in numbers: High parasite  
631 burdens increase transmission of a protozoan parasite of monarch butterflies (*Danaus*  
632 *plexippus*). *Oecologia*, 161(1), 67–75. doi:10.1007/s00442-009-1361-6
- 633 de Roode, J. C., Pedersen, A. B., Hunter, M. D., & Altizer, S. (2008). Host plant species affects  
634 virulence in monarch butterfly parasites. *Journal of Animal Ecology*, 77(1), 120–126.  
635 doi:10.1111/j.1365-2656.2007.01305.x
- 636 de Roode, J. C., Rarick, R. M., Mongue, A. J., Gerardo, N. M., & Hunter, M. D. (2011). Aphids  
637 indirectly increase virulence and transmission potential of a monarch butterfly parasite by  
638 reducing defensive chemistry of a shared food plant. *Ecology Letters*, 14(5), 453–461.  
639 doi:10.1111/j.1461-0248.2011.01604.x
- 640 de Roode, J. C., Yates, A. J., Altizer, S., & Roode, J. C. De. (2008). Virulence-transmission  
641 trade-offs and population divergence in virulence in a naturally occurring butterfly parasite.  
642 *Proceedings of the National Academy of Sciences of the United States of America*, 105(21),  
643 7489–7494. doi:10.1073/pnas.0710909105
- 644 Després, L., David, J. P., & Gallet, C. (2007). The evolutionary ecology of insect resistance to  
645 plant chemicals. *Trends in Ecology & Evolution*, 22(6), 298–307.  
646 doi:10.1016/j.tree.2007.02.010
- 647 Dobin, A., Davis, C. A., Schlesinger, F., Drenkow, J., Zaleski, C., Jha, S., ... Gingeras, T. R.  
648 (2013). STAR: Ultrafast universal RNA-seq aligner. *Bioinformatics*, 29(1), 15–21.  
649 doi:10.1093/bioinformatics/bts635
- 650 Dobler, S., Dalla, S., Wagschal, V., & Agrawal, A. A. (2012). Community-wide convergent

- 651 evolution in insect adaptation to toxic cardenolides by substitutions in the Na<sup>+</sup>, K<sup>+</sup>-ATPase.  
652 *Proceedings of the National Academy of Sciences*, 109(32), 13040–13045.  
653 doi:10.1073/pnas.1202111109
- 654 Dong, Y., & Dimopoulos, G. (2009). *Anopheles* fibrinogen-related proteins provide expanded  
655 pattern recognition capacity against bacteria and malaria parasites. *Journal of Biological*  
656 *Chemistry*, 284(15), 9835–9844. doi:10.1074/jbc.M807084200
- 657 Dong, Y., Simões, M. L., Marois, E., & Dimopoulos, G. (2018). CRISPR/Cas9 -mediated gene  
658 knockout of *Anopheles gambiae* FREP1 suppresses malaria parasite infection. *PLoS*  
659 *Pathogens*, 14(3), e1006898. doi:10.1371/journal.ppat.1006898
- 660 Dyer, L. A., & Bowers, M. D. (1996). The importance of sequestered iridoid glycosides as a  
661 defense against an ant predator. *Journal of Chemical Ecology*, 22(8), 1527–1539.  
662 doi:10.1007/BF02027729
- 663 Evans, J. D., Aronstein, K., Chen, Y. P., Hetru, C., Imler, J. L., Jiang, H., ... Hultmark, D.  
664 (2006). Immune pathways and defence mechanisms in honey bees *Apis mellifera*. *Insect*  
665 *Molecular Biology*, 15(5), 645–656.
- 666 Ewels, P., Magnusson, M., Lundin, S., & Käller, M. (2016). MultiQC: Summarize analysis  
667 results for multiple tools and samples in a single report. *Bioinformatics*, 32(19), 3047–3048.  
668 doi:10.1093/bioinformatics/btw354
- 669 Foster, S. P., Bass, C., Williamson, M. S., Millar, N. S., Field, L. M., Oliphant, L., ... Puinean, A.  
670 M. (2010). Amplification of a cytochrome P450 gene is associated with resistance to  
671 neonicotinoid insecticides in the aphid *Myzus persicae*. *PLoS Genetics*, 6(6), e1000999.  
672 doi:10.1371/journal.pgen.1000999
- 673 Gowler, C. D., Leon, K. E., Hunter, M. D., & de Roode, J. C. (2015). Secondary defense  
674 chemicals in milkweed reduce parasite infection in monarch butterflies, *Danaus plexippus*.  
675 *Journal of Chemical Ecology*, 41(6), 520–523. doi:10.1007/s10886-015-0586-6
- 676 Gurung, P., & Kanneganti, T. D. (2015). Innate immunity against *Leishmania* infections. *Cellular*  
677 *Microbiology*, 17(9), 1286–1294. doi:10.1111/cmi.12484
- 678 Hoang, K. L., Matzkin, L. M., & Bono, J. M. (2015). Transcriptional variation associated with  
679 cactus host plant adaptation in *Drosophila mettleri* populations. *Molecular Ecology*, 24(20),  
680 5186–5199. doi:10.1111/mec.13388
- 681 Jones, P. L., Peschenka, G., Flacht, L., & Agrawal, A. A. (2019). Cardenolide intake,  
682 sequestration, and excretion by the monarch butterfly along gradients of plant toxicity and  
683 larval ontogeny. *Journal of Chemical Ecology*. doi:10.1007/s10886-019-01055-7
- 684 Lampert, E. C. (2012). Influences of plant traits on immune responses of specialist and generalist

- 685 herbivores. *Insects*, 3(2), 573–592. doi:10.3390/insects3020573
- 686 Laurentz, M., Reudler, J. H., Mappes, J., Friman, V., Ikonen, S., & Lindstedt, C. (2012). Diet  
687 quality can play a critical role in defense efficacy against parasitoids and pathogens in the  
688 glanville fritillary (*Melitaea cinxia*). *Journal of Chemical Ecology*, 38(1), 116–125.  
689 doi:10.1007/s10886-012-0066-1
- 690 Lefèvre, T., Oliver, L., Hunter, M. D., & de Roode, J. C. (2010). Evidence for trans-generational  
691 medication in nature. *Ecology Letters*, 13(12), 1485–1493. doi:10.1111/j.1461-  
692 0248.2010.01537.x
- 693 Leighton, T., Marks, E., & Leighton, F. (1981). Pesticides : insecticides and fungicides are chitin  
694 synthesis inhibitors. *Science*, 213(4510), 905–907.
- 695 MacGregor, P., Szöör, B., Savill, N. J., & Matthews, K. R. (2012). Trypanosomal immune  
696 evasion, chronicity and transmission: An elegant balancing act. *Nature Reviews*  
697 *Microbiology*, 10(6), 431–438. doi:10.1038/nrmicro2779
- 698 Malcolm, S. B. (1991). Cardenolide-mediated interactions between plants and herbivores. In G.  
699 Rosenthal & M. Berenbaum (Eds.), *Herbivores: Their interactions with secondary plant*  
700 *metabolites, Vol. I: The chemical participants* (second ed., pp. 251–291). San Diego.
- 701 Malcolm, S. B. (1994). Milkweeds, monarch butterflies and the ecological significance of  
702 cardenolides. *Chemoecology*, 5(3–4), 101–117. doi:10.1007/BF01240595
- 703 Mao, W., Rupasinghe, S., Zangerl, A. R., Schuler, M. A., & Berenbaum, M. R. (2006).  
704 Remarkable substrate-specificity of CYP6AB3 in *Depressaria pastinacella*, a highly  
705 specialized caterpillar. *Insect Molecular Biology*, 15(2), 169–179. doi:10.1111/j.1365-  
706 2583.2006.00623.x
- 707 Marty, M. A., & Krieger, R. I. (1984). Metabolism of uscharidin, a milkweed cardenolide, by  
708 tissue homogenates of monarch butterfly larvae, *Danaus plexippus* L. *Journal of Chemical*  
709 *Ecology*, 10(6), 945–956.
- 710 Mathers, T. C., Chen, Y., Kaithakottil, G., Legeai, F., Mugford, S. T., Baa-Puyoulet, P., ...  
711 Hogenhout, S. A. (2017). Rapid transcriptional plasticity of duplicated gene clusters enables  
712 a clonally reproducing aphid to colonise diverse plant species. *Genome Biology*, 18(1), 1–  
713 20. doi:10.1186/s13059-016-1145-3
- 714 Matzkin, L. M. (2012). Population transcriptomics of cactus host shifts in *Drosophila*  
715 *mojavensis*. *Molecular Ecology*, 21(10), 2428–2439. doi:10.1111/j.1365-  
716 294X.2012.05549.x
- 717 Mclaughlin, R. E., & Myers, J. (1970). *Ophryocystis elektroscirrha* sp., a Neogregarine pathogen  
718 of monarch butterfly *Danaus plexippus* ( L .) and the Florida queen butterfly *D . gilippus*

- 719 berenice Cramer. *Journal of Protozoology*, 17(2), 300–305. doi:10.1111/j.1550-  
720 7408.1970.tb02375.x
- 721 Moret, Y., & Schmid-Hempel, P. (2000). Survival for immunity: the price of immune system  
722 activation for bumblebee workers. *Science*, 290(November), 1166–1169.  
723 doi:10.1126/science.290.5494.1166
- 724 Nishida, R. (2002). Sequestration of defense substances from plants by Lepidoptera. *Annual*  
725 *Review of Entomology*, 47, 57–92. doi:10.1146/annurev.ento.47.091201.145121
- 726 Opitz, S. E. W., & Müller, C. (2009). Plant chemistry and insect sequestration. *Chemoecology*,  
727 19(3), 117–154. doi:10.1007/s00049-009-0018-6
- 728 Petschenka, G., & Agrawal, A. A. (2015). Milkweed butterfly resistance to plant toxins is linked  
729 to sequestration, not coping with a toxic diet. *Proceedings of the Royal Society B: Biological*  
730 *Sciences*, 282(1818), 20151865. doi:10.1098/rspb.2015.1865
- 731 Petschenka, G., Offe, J. K., & Dobler, S. (2012). Physiological screening for target site  
732 insensitivity and localization of Na<sup>+</sup>/K<sup>+</sup>-ATPase in cardenolide-adapted Lepidoptera.  
733 *Journal of Insect Physiology*, 58(5), 607–612. doi:10.1016/j.jinsphys.2011.12.012
- 734 R Core Team. (2018). R: A language and environment for statistical computing. R Foundation  
735 for Statistical Computing. Vienna, Austria. Retrieved from <https://www.r-project.org/>
- 736 Robinson, M. D., McCarthy, D. J., & Smyth, G. K. (2009). EdgeR: A Bioconductor package for  
737 differential expression analysis of digital gene expression data. *Bioinformatics*, 26(1), 139–  
738 140. doi:10.1093/bioinformatics/btp616
- 739 Rosenthal, G., & Berenbaum, M. R. (1991). *Herbivores: their interaction with secondary plant*  
740 *metabolites, Vol. II: Ecological and evolutionary processes* (second edi). San Diego:  
741 Academic Press.
- 742 Schoonhoven, L., van Loon, J., & Dicke, M. (2005). *Insect-plant biology* (second edi). New  
743 York: Oxford University Press.
- 744 Schuler, M. A. (1996). The role of cytochrome P450 monooxygenases in plant-insect  
745 interactions. *Plant Physiology*, (112), 1411–1419.
- 746 Schweizer, F., Heidel-Fischer, H., Vogel, H., & Reymond, P. (2017). Arabidopsis glucosinolates  
747 trigger a contrasting transcriptomic response in a generalist and a specialist herbivore. *Insect*  
748 *Biochemistry and Molecular Biology*, 85, 21–31. doi:10.1016/j.ibmb.2017.04.004
- 749 Selkirk, M. E., Bundy, D. A. P., Smith, D. F., Anderson, R. M., & Maizels, R. M. (2003).  
750 Immunological modulation and evasion by helminth parasites in human populations. *Nature*,  
751 365(6449), 797–805. doi:10.1038/365797a0
- 752 Simões, M. L., Dong, Y., Hammond, A., Hall, A., Crisanti, A., Nolan, T., & Dimopoulos, G.

- 753 (2017). The *Anopheles* FBN9 immune factor mediates *Plasmodium* species-specific defense  
754 through transgenic fat body expression. *Developmental and Comparative Immunology*, 67,  
755 257–265. doi:10.1016/j.dci.2016.09.012
- 756 Simone, M., Evans, J. D., & Spivak, M. (2009). Resin collection and social immunity in honey  
757 bees. *Evolution*, 63(11), 3016–3022. doi:10.1111/j.1558-5646.2009.00772.x
- 758 Singer, M. S., Mace, K. C., & Bernays, E. A. (2009). Self-medication as adaptive plasticity:  
759 Increased ingestion of plant toxins by parasitized caterpillars. *PLoS ONE*, 4(3), e4796.  
760 doi:10.1371/journal.pone.0004796
- 761 Smilanich, A. M., Dyer, L. A., Chambers, J. Q., & Bowers, M. D. (2009). Immunological cost of  
762 chemical defence and the evolution of herbivore diet breadth. *Ecology Letters*, 12(7), 612–  
763 621. doi:10.1111/j.1461-0248.2009.01309.x
- 764 Smilanich, A. M., Teglas, M. B., Harrison, J. G., Hsueh, J., Dyer, L. A., Langus, T. C., & Doan,  
765 L. (2017). Host plant associated enhancement of immunity and survival in virus infected  
766 caterpillars. *Journal of Invertebrate Pathology*, 151(October 2017), 102–112.  
767 doi:10.1016/j.jip.2017.11.006
- 768 Smilanich, A. M., Vargas, J., Dyer, L. A., & Bowers, M. D. (2011). Effects of ingested secondary  
769 metabolites on the immune response of a polyphagous caterpillar *Grammia incorrupta*.  
770 *Journal of Chemical Ecology*, 37(3), 239–245. doi:10.1007/s10886-011-9924-5
- 771 Sternberg, E. D., de Roode, J. C., & Hunter, M. D. (2015). Trans-generational parasite protection  
772 associated with paternal diet. *Journal of Animal Ecology*, 84(1), 310–321.  
773 doi:10.1111/1365-2656.12289
- 774 Sternberg, E. D., Lefèvre, T., Li, J., Lopez, C., Castillejo, F. De, Li, H., ... Roode, J. C. De.  
775 (2012). Food plant-derived disease tolerance and resistance in a natural butterfly-plant-  
776 parasite interactions. *Evolution*, 66(11), 3367–3377. doi:10.5061/dryad.82j66
- 777 Strauss, A. S., Peters, S., Boland, W., & Burse, A. (2013). ABC transporter functions as a  
778 pacemaker for sequestration of plant glucosides in leaf beetles. *eLife*, 2013(2), 1–16.  
779 doi:10.7554/eLife.01096
- 780 Tan, W.-H., Tao, L., Hoang, K. M., Hunter, M. D., & de Roode, J. C. (2018). The effects of  
781 milkweed induced defense on parasite resistance in monarch butterflies, *Danaus plexippus*.  
782 *Journal of Chemical Ecology*, 44(11), 1040–1044. doi:10.1007/s10886-018-1007-4
- 783 Tao, L., Ahmad, A., de Roode, J. C., & Hunter, M. D. (2016). Arbuscular mycorrhizal fungi  
784 affect plant tolerance and chemical defences to herbivory through different mechanisms.  
785 *Journal of Ecology*, 104(2), 561–571. doi:10.1111/1365-2745.12535
- 786 Tao, L., Gowler, C. D., Ahmad, A., Hunter, M. D., & de Roode, J. C. (2015). Disease ecology



- 787 across soil boundaries: effects of below-ground fungi on above-ground host–parasite  
788 interactions. *Proceedings of the Royal Society B: Biological Sciences*, 282(1817), 20151993.  
789 doi:10.1098/rspb.2015.1993
- 790 Tao, L., Hoang, K. M., Hunter, M. D., & de Roode, J. C. (2016). Fitness costs of animal  
791 medication: antiparasitic plant chemicals reduce fitness of monarch butterfly hosts. *The*  
792 *Journal of Animal Ecology*, 85(5), 1246–1254. doi:10.1111/1365-2656.12558
- 793 Theodoratus, D. H., & Bowers, M. D. (1999). Effects of sequestered iridoid glycosides on prey  
794 choice of the prairie wolf spider, *Lycosa carolinensis*. *Journal of Chemical Ecology*, 25(2),  
795 283–295. doi:10.1023/A:1020894729188
- 796 Törönen, P., Medlar, A., & Holm, L. (2018). PANNZER2: A rapid functional annotation web  
797 server. *Nucleic Acids Research*, 46(W1), W84–W88. doi:10.1093/nar/gky350
- 798 Uésugi, K. (2010). The adaptive significance of Batesian mimicry in the swallowtail butterfly,  
799 *Papilio polytes* (Insecta, Papilionidae): associative learning in a predator. *Ethology*, 102(5),  
800 762–775. doi:10.1111/j.1439-0310.1996.tb01165.x
- 801 Vlachou, D., Schlegelmilch, T., Christophides, G. K., & Kafatos, F. C. (2005). Functional  
802 genomic analysis of midgut epithelial responses in *Anopheles* during *Plasmodium* invasion.  
803 *Current Biology*, 15(13), 1185–1195. doi:10.1016/j.cub.2005.06.044
- 804 Vogel, H., Musser, R. O., & de la Paz Celorio-Mancera, M. (2014). Transcriptome responses in  
805 herbivorous insects towards host plant and toxin feeding. In *Annual Plant Reviews: Insect-*  
806 *Plant Interactions* (Vol. 47, pp. 197–233). doi:10.1002/9781118829783.ch6
- 807 Volz, J., Müller, H. M., Zdanowicz, A., Kafatos, F. C., & Osta, M. A. (2006). A genetic module  
808 regulates the melanization response of *Anopheles* to *Plasmodium*. *Cellular Microbiology*,  
809 8(9), 1392–1405. doi:10.1111/j.1462-5822.2006.00718.x
- 810 Warnes, G. R., Bolker, B., Bonebakker, L., Gentleman, R., Huber, W., Liaw, A., ... Venables, B.  
811 (2016). gplots: Various R programming tools for plotting data. Retrieved from [https://cran.r-](https://cran.r-project.org/package=gplots)  
812 [project.org/package=gplots](https://cran.r-project.org/package=gplots)
- 813 Wen, Z., Pan, L., Berenbaum, M. R., & Schuler, M. A. (2003). Metabolism of linear and angular  
814 furanocoumarins by *Papilio polyxenes* CYP6B1 co-expressed with NADPH cytochrome  
815 P450 reductase. *Insect Biochemistry and Molecular Biology*, 33, 937–947.  
816 doi:10.1016/S0965-1748(03)00100-0
- 817 Werck-Reichhart, D., & Feyereisen, R. (2000). Cytochromes P450: a success story. *Genome*  
818 *Biology*, 1(6), reviews3003.1-3003.9. doi:10.1186/gb-2000-1-6-reviews3003
- 819 Yu, G., Wang, L.-G., Han, Y., & He, Q.-Y. (2012). ClusterProfiler: an R package for comparing  
820 biological themes among gene clusters. *OMICS: A Journal of Integrative Biology*, 16(5),

- 821 284–287. doi:10.1089/omi.2011.0118
- 822 Yu, Q.-Y., Fang, S.-M., Zhang, Z., & Jiggins, C. D. (2016). The transcriptome response of  
823 *Heliconius melpomene* larvae to a novel host plant. *Molecular Ecology*, 25(19), 4850–4865.  
824 doi:10.1111/mec.13826
- 825 Zalucki, M. P., & Brower, L. P. (1992). Survival of first instar larvae of *Danaus plexippus*  
826 (Lepidoptera: Danainae) in relation to cardiac glycoside and latex content of *Asclepias*  
827 *humistrata* (Asclepiadaceae). *Chemoecology*, 3(2), 81–93. doi:10.1007/BF01245886
- 828 Zalucki, M. P., Brower, L. P., & Alonso-M, A. (2001). Detrimental effects of latex and cardiac  
829 glycosides on survival and growth of first-instar monarch butterfly larvae *Danaus plexippus*  
830 feeding on the sandhill milkweed *Asclepias humistrata*. *Ecological Entomology*, 26(2), 212–  
831 224. doi:10.1046/j.1365-2311.2001.00313.x
- 832 Zalucki, M. P., Brower, L. P., & Malcolm, S. B. (1990). Oviposition by *Danaus plexippus* in  
833 relation to cardenolide content of three *Asclepias* species in the southeastern U.S.A.  
834 *Ecological Entomology*, 15, 231–240.
- 835 Zhan, S., Merlin, C., Boore, J. L., & Reppert, S. M. (2011). The monarch butterfly genome yields  
836 insights into long-distance migration. *Cell*, 147(5), 1171–1185.  
837 doi:10.1016/j.cell.2011.09.052
- 838 Zhan, S., & Reppert, S. M. (2013). MonarchBase: The monarch butterfly genome database.  
839 *Nucleic Acids Research*, 41(D1), 758–763. doi:10.1093/nar/gks1057
- 840 Zhang, G., Niu, G., Franca, C. M., Dong, Y., Wang, X., Butler, N. S., ... Li, J. (2015). *Anopheles*  
841 midgut FREP1 mediates *Plasmodium* invasion. *Journal of Biological Chemistry*, 290(27),  
842 16490–16501. doi:10.1074/jbc.M114.623165
- 843 Zhen, Y., Aardema, M. L., Medina, E. M., Schumer, M., & Andolfatto, P. (2012). Parallel  
844 molecular evolution in an herbivore community. *Science*, 337(6102), 1634–1637.  
845 doi:10.1126/science.1226630.
- 846 Zhong, H., Li, F., Chen, J., Zhang, J., & Li, F. (2017). Comparative transcriptome analysis  
847 reveals host-associated differentiation in *Chilo suppressalis* (Lepidoptera: Crambidae).  
848 *Scientific Reports*, 7(1), 1–11. doi:10.1038/s41598-017-14137-x
- 849

## 850 **DATA ACCESSIBILITY**

851 All sequence data will be archived at the NCBI GeneBank, and other data will be deposited  
852 to the Dryad Digital Repository, if the manuscript is accepted for publication. Custom  
853 transcriptomic analysis scripts can be found in the following GitHub repository:  
854 [https://github.com/WaltersLab/Monarch\\_RNA-Seq](https://github.com/WaltersLab/Monarch_RNA-Seq)

855

## 856 **AUTHOR CONTRIBUTIONS**

857 WHT designed and carried out experiments, performed data analyses, and wrote the initial  
858 manuscript. NMG, MDH, and JCdR designed experiments and edited the manuscript. TA, EVH,  
859 TYA, and JCdR carried out experiments. JRW provided additional guidance on transcriptomic  
860 analyses. MDH supervised chemical analyses. All authors have reviewed and provided comments  
861 on the manuscript.

862 **TABLES AND FIGURES**

863  
864 **Table 1.** Summary of differentially expressed genes. The first two columns denote specific  
865 comparisons and the subset of samples used. The last three columns indicate the number of  
866 significantly up-regulated and down-regulated genes upon infection, or between those fed with  
867 different milkweed species, in either gut tissue or body. First, we compared infected and uninfected  
868 larvae in all samples to assess overall transcriptional patterns of parasite infection (*i.e.*, the first  
869 row). We then compared infected and uninfected larvae reared on the two milkweed species  
870 separately to examine plant-specific effects (*i.e.*, the second and third rows). Next, we compared  
871 larvae fed with *A. incarnata* and *A. curassavica*. Given that we found almost no differences  
872 between infected and uninfected groups, we combined them for this comparison (*i.e.*, the fourth  
873 row).

| <b>Factor</b> | <b>Subset</b>         | <b>Direction</b>                   | <b>Gut</b> | <b>Body</b> |
|---------------|-----------------------|------------------------------------|------------|-------------|
| Infection     | All                   | up-regulated in infected           | 0          | 0           |
|               |                       | down-regulated in infected         | 0          | 0           |
| Infection     | <i>A. incarnata</i>   | up-regulated in infected           | 1          | 0           |
|               |                       | down-regulated in infected         | 0          | 0           |
| Infection     | <i>A. curassavica</i> | up-regulated in infected           | 0          | 2           |
|               |                       | down-regulated in infected         | 0          | 0           |
| Plant         | All                   | increased in <i>A. curassavica</i> | 271        | 122         |
|               |                       | Increased in <i>A. incarnata</i>   | 637        | 306         |

874

875 **Table 2.** List of top 15 differentially expressed genes in gut tissue between larvae fed with *A.*  
 876 *curassavica* and *A. incarnata*. The list includes the top 15 genes significantly up-regulated when  
 877 fed with *A. curassavica* and the top 15 genes significantly up-regulated when fed with *A. incarnata*.

| Gene ID                                                   | log <sub>2</sub> FC | logCPM | FDR       | Protein                                        |
|-----------------------------------------------------------|---------------------|--------|-----------|------------------------------------------------|
| <b><i>Top 15 up-regulated genes in A. curassavica</i></b> |                     |        |           |                                                |
| DPOGS201344                                               | 6.372               | 5.747  | 8.896E-05 | Uncharacterized                                |
| DPOGS202254                                               | 5.589               | 5.739  | 1.040E-04 | Threonine dehydratase catabolic-like isoform 2 |
| DPOGS215709                                               | 5.049               | 13.155 | 1.596E-04 | Uncharacterized                                |
| DPOGS212746                                               | 4.112               | 10.044 | 2.210E-04 | Uncharacterized                                |
| DPOGS213427                                               | 4.699               | 4.654  | 2.947E-04 | Phosphatidyltransferase                        |
| DPOGS204785                                               | 9.623               | 3.669  | 2.947E-04 | Carboxypeptidase 4                             |
| DPOGS209145                                               | 7.309               | 6.446  | 4.455E-04 | Uncharacterized                                |
| DPOGS204275                                               | 5.239               | 3.825  | 5.752E-04 | Carboxyl/choline esterase                      |
| DPOGS213104                                               | 7.410               | 4.420  | 5.799E-04 | Zinc finger protein                            |
| DPOGS204877                                               | 5.220               | 7.017  | 5.799E-04 | Uncharacterized                                |
| DPOGS210488                                               | 10.030              | -1.820 | 1.296E-03 | Glutathione S-transferase epsilon 4            |
| DPOGS205617                                               | 8.315               | 4.894  | 1.296E-03 | Gucocerebrosidase                              |
| DPOGS200701                                               | 4.470               | 3.245  | 1.614E-03 | Spliceosomal protein                           |
| DPOGS214834                                               | 2.985               | 6.014  | 1.746E-03 | Juvenile hormone epoxide hydrolase             |
| DPOGS206961                                               | 3.390               | 6.869  | 1.906E-03 | Fructose 1,6-bisphosphate aldolase             |
| <b><i>Top 15 up-regulated genes in A. incarnata</i></b>   |                     |        |           |                                                |
| DPOGS213127                                               | -14.990             | 2.053  | 2.820E-06 | Nuclear receptor GRF                           |
| DPOGS209249                                               | -21.366             | 5.499  | 6.322E-05 | Uncharacterized                                |
| DPOGS205455                                               | -11.005             | 1.492  | 8.896E-05 | Uncharacterized                                |
| DPOGS215049                                               | -8.676              | 3.715  | 1.040E-04 | Peroxidasin-like protein                       |
| DPOGS214337                                               | -4.961              | 2.053  | 1.040E-04 | Dystrophin                                     |
| DPOGS206024                                               | -4.189              | 4.407  | 1.040E-04 | Uncharacterized                                |
| DPOGS205589                                               | -10.789             | 5.246  | 1.909E-04 | Hormone receptor 3C                            |
| DPOGS215508                                               | -3.738              | 3.000  | 2.210E-04 | Uncharacterized                                |
| DPOGS210943                                               | -7.584              | 5.638  | 2.210E-04 | Uncharacterized                                |
| DPOGS211620                                               | -9.907              | 4.977  | 2.947E-04 | Uncharacterized                                |
| DPOGS202595                                               | -9.197              | 4.968  | 3.075E-04 | Serpin-27                                      |
| DPOGS209028                                               | -8.462              | 1.370  | 3.075E-04 | Uncharacterized                                |
| DPOGS207056                                               | -10.801             | 0.320  | 3.075E-04 | Uncharacterized                                |
| DPOGS200549                                               | -5.086              | 1.072  | 3.075E-04 | Aminopeptidase N-like protein                  |
| DPOGS200623                                               | -8.542              | 2.970  | 3.075E-04 | Molting fluid carboxypeptidase                 |

878

879 **Table 3.** List of top 15 differentially expressed genes in body tissues between larvae fed with *A.*  
 880 *curassavica* and *A. incarnata*. The list includes the top 15 genes significantly up-regulated when  
 881 fed with *A. curassavica* and the top 15 genes significantly up-regulated when fed with *A. incarnata*.

| Gene ID                                                   | log <sub>2</sub> FC | logCPM | FDR       | Protein                                        |
|-----------------------------------------------------------|---------------------|--------|-----------|------------------------------------------------|
| <b><i>Top 15 up-regulated genes in A. curassavica</i></b> |                     |        |           |                                                |
| DPOGS202254                                               | 5.862               | 5.916  | 3.531E-05 | Threonine dehydratase catabolic-like isoform 2 |
| DPOGS207974                                               | 8.391               | 3.079  | 4.263E-04 | Cuticle protein                                |
| DPOGS210599                                               | 5.474               | 4.955  | 5.561E-04 | Cytochrome b5                                  |
| DPOGS207878                                               | 7.965               | 6.632  | 6.747E-04 | Antennal binding protein                       |
| DPOGS209820                                               | 10.405              | 1.778  | 1.544E-03 | Allantoicase                                   |
| DPOGS204877                                               | 4.834               | 7.461  | 2.096E-03 | Neuropeptide-like precursor                    |
| DPOGS209878                                               | 14.095              | 4.153  | 2.685E-03 | Cuticle protein                                |
| DPOGS201344                                               | 4.463               | 4.569  | 2.685E-03 | Uncharacterized                                |
| DPOGS213427                                               | 5.256               | 4.346  | 2.893E-03 | Phosphatidyltransferase                        |
| DPOGS212746                                               | 4.380               | 10.241 | 3.452E-03 | Uncharacterized                                |
| DPOGS204901                                               | 8.429               | 3.785  | 6.396E-03 | Cuticle protein                                |
| DPOGS202353                                               | 2.649               | 4.584  | 6.396E-03 | Serine protease inhibitor 32                   |
| DPOGS200671                                               | 9.672               | 2.135  | 6.396E-03 | Cuticle protein                                |
| DPOGS204876                                               | 5.325               | 2.603  | 6.911E-03 | Uncharacterized                                |
| DPOGS204902                                               | 7.870               | 2.782  | 6.911E-03 | Cuticle protein                                |
| <b><i>Top 15 up-regulated genes in A. incarnata</i></b>   |                     |        |           |                                                |
| DPOGS213127                                               | -11.298             | 2.225  | 8.082E-06 | Nuclear receptor GRF                           |
| DPOGS205589                                               | -10.791             | 5.267  | 1.967E-05 | Hormone receptor 3C                            |
| DPOGS216089                                               | -7.901              | 2.515  | 3.531E-05 | Uncharacterized                                |
| DPOGS209528                                               | -11.924             | 2.200  | 6.803E-05 | UDP-glycosyltransferase                        |
| DPOGS207933                                               | -7.987              | 2.536  | 4.245E-04 | Uncharacterized                                |
| DPOGS201723                                               | -8.964              | 3.188  | 4.245E-04 | Peritrophic matrix protein                     |
| DPOGS209249                                               | -17.175             | 6.228  | 5.561E-04 | Uncharacterized                                |
| DPOGS211620                                               | -12.359             | 5.805  | 1.142E-03 | Uncharacterized                                |
| DPOGS204937                                               | -4.721              | 3.391  | 1.358E-03 | Polypeptide N-acetylgalactosaminyltransferase  |
| DPOGS212114                                               | -14.837             | 3.068  | 1.358E-03 | Laccase-like multicopper oxidase 2             |
| DPOGS212041                                               | -3.204              | 2.933  | 2.685E-03 | Fibroblast growth factor receptor              |
| DPOGS207643                                               | -15.926             | 4.052  | 3.542E-03 | Cytochrome P450 6AB4                           |
| DPOGS205455                                               | -10.749             | 3.336  | 3.542E-03 | Uncharacterized                                |
| DPOGS213243                                               | -6.609              | 4.497  | 3.542E-03 | Cytochrome P450                                |
| DPOGS201539                                               | -12.438             | 6.447  | 3.542E-03 | Uncharacterized                                |

882

883 **Table 4.** Canonical immune genes that were significantly differentially expressed in gut tissue  
 884 between larvae fed with *A. curassavica* and *A. incarnata*. No canonical immune genes were  
 885 significantly differentially expressed between infected and uninfected larvae.

| Immune gene                        | Tissue | Direction                        | LogFC | LogCPM | FDR    |
|------------------------------------|--------|----------------------------------|-------|--------|--------|
| CLIP serine protease (DPOGS215180) | gut    | Increased in <i>A. incarnata</i> | -5.94 | 1.61   | 0.003  |
| Frep-like receptor (DPOGS203317)   | gut    | Increased in <i>A. incarnata</i> | -4.85 | 1.79   | 0.007  |
| CLIP serine protease (DPOGS213841) | gut    | Increased in <i>A. incarnata</i> | -6.73 | -0.47  | 0.012  |
| Toll-like receptor (DPOGS211472)   | gut    | Increased in <i>A. incarnata</i> | -3.82 | 2.61   | 0.0140 |
| CLIP serine protease (DPOGS215180) | body   | Increased in <i>A. incarnata</i> | -5.76 | 2.45   | 0.04   |

886  
 887  
 888 **Table 5.** Canonical detoxification genes that were significantly differentially expressed in gut tissue  
 889 between larvae fed with *A. curassavica* and *A. incarnata*. The second column, “Annotated”,  
 890 indicates the number of annotated genes in the genome for the given gene family. The third column,  
 891 “Expressed”, indicates the number of genes that were expressed in our RNA-seq dataset (defined  
 892 as counts > 0 in at least two samples). The last two columns show the number of significantly  
 893 differentially expressed genes.

| Gene family                                          | Annotated | Expressed | Increased in <i>A. curassavica</i> | Increased in <i>A. incarnata</i> |
|------------------------------------------------------|-----------|-----------|------------------------------------|----------------------------------|
| Cytochrome P450 (CYP)                                | 75        | 72        | 6                                  | 3                                |
| UDP glucuronosyltransferases (UGT)                   | 35        | 34        | 2                                  | 1                                |
| ATP-binding cassette transporters (ABC transporters) | 61        | 60        | 0                                  | 8                                |
| Glutathione S-transferases (GSTs)                    | 33        | 31        | 1                                  | 1                                |

894

895 **Table 6.** Number of significantly functionally enriched GO terms in gut and body tissues between  
896 larvae fed with *A. curassavica* and *A. incarnata*. BP = biological process, MF = molecular function,  
897 CC = cellular component. Multiple testing was accounted for using the Benjamini-Hochberg  
898 method.

| <b>Tissue type</b> | <b>direction</b>                   | <b>BP</b> | <b>MF</b> | <b>CC</b> | <b>Total</b> |
|--------------------|------------------------------------|-----------|-----------|-----------|--------------|
| Gut                | Increased in <i>A. curassavica</i> | 9         | 3         | 7         | 19           |
| Gut                | Increased in <i>A. incarnata</i>   | 102       | 0         | 10        | 112          |
| Body               | Increased in <i>A. curassavica</i> | 0         | 1         | 0         | 1            |
| Body               | Increased in <i>A. incarnata</i>   | 4         | 2         | 0         | 6            |

899



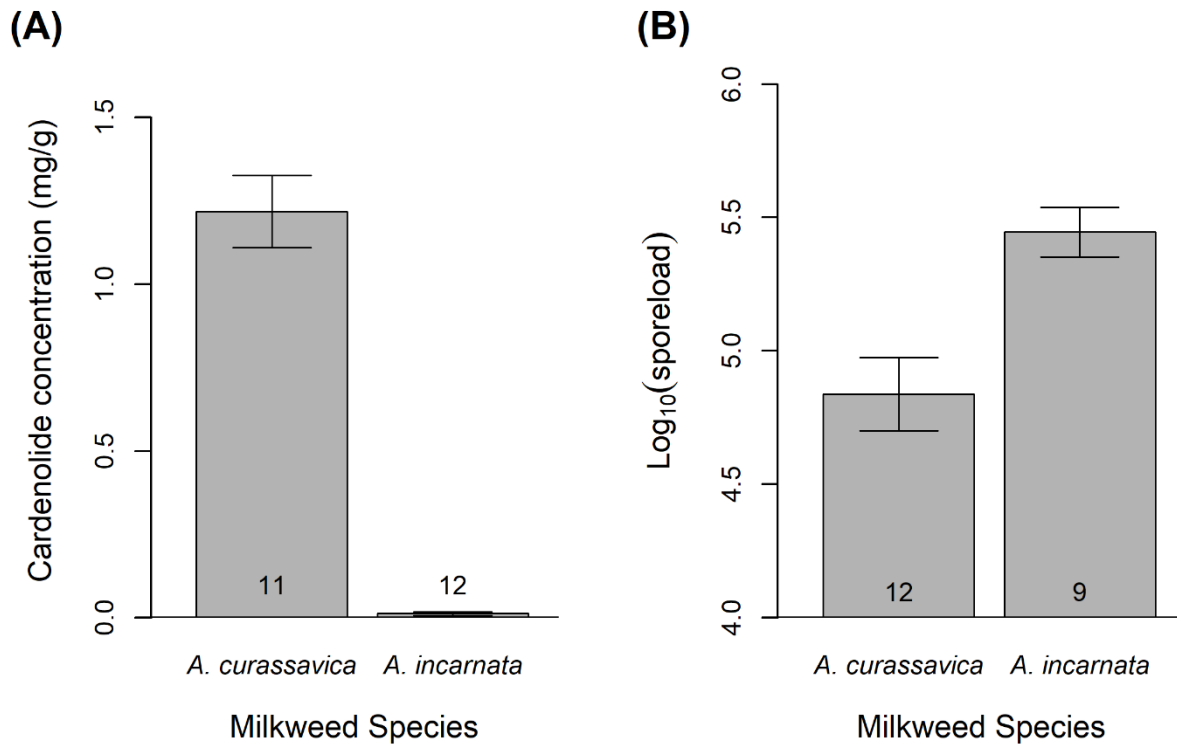

900  
901 **Figure 1.** Differences in foliar cardenolide concentration and monarch parasite resistance between  
902 the two milkweed species, *A. curassavica* and *A. incarnata*. (A) Total cardenolide concentraion of  
903 foliage. (B) The effect of milkweed species on parasite spore load in infected monarchs. Data  
904 represent mean  $\pm$ 1 SEM. Sample sizes are reported on each bar.  
905

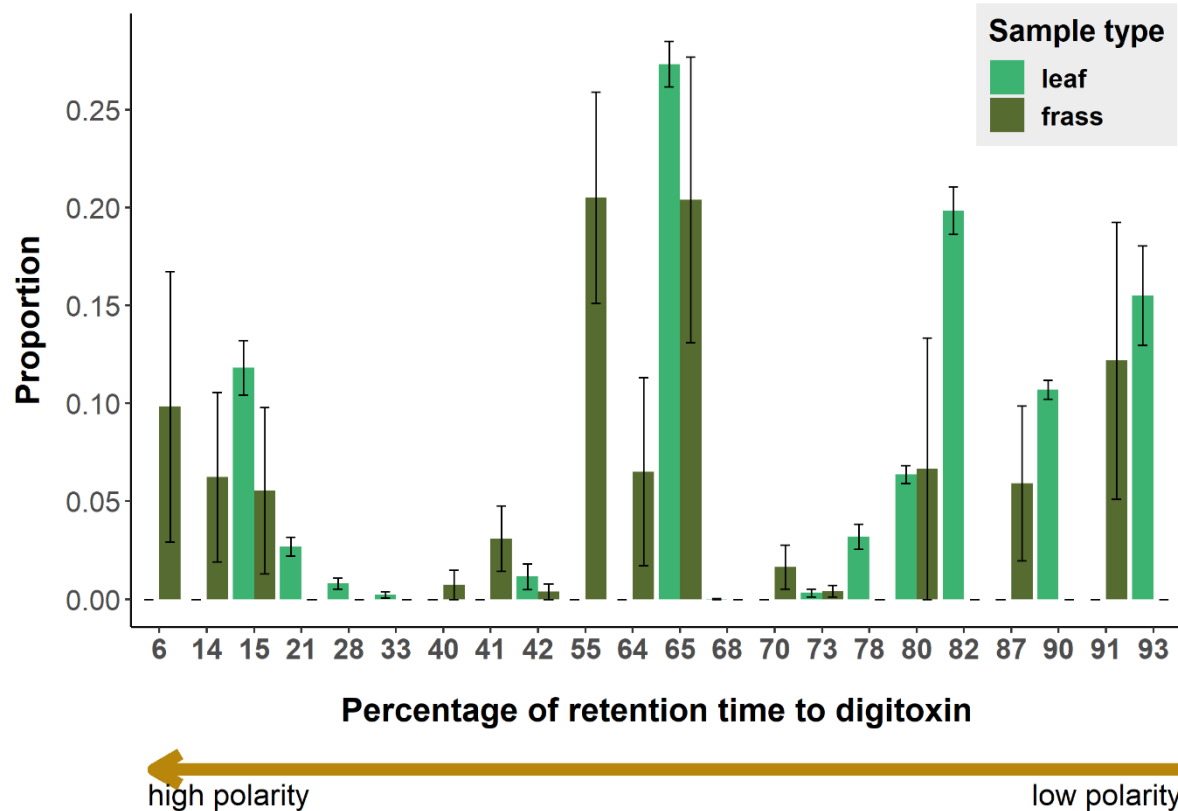

906  
907 **Figure 2.** Cardenolide composition of *A. curassavica* foliage and frass produced by larvae fed with  
908 *A. curassavica*. The X-axis represents the percentage of retention time relative to a digitoxin  
909 internal standard in UPLC. Bars represent individual cardenolides. The Y-axis represents the  
910 proportion of the individual cardenolide within each sample. Data represent the mean  $\pm 1$  SEM.  
911 Sample sizes: N = 11 for foliage samples (each sample was collected from a different individual  
912 plant) and N = 17 for frass samples (each sample was collected from a different individual larva).  
913 We only focused on *A. curassavica* because *A. incarnata* foliage contains very few cardenolides.  
914

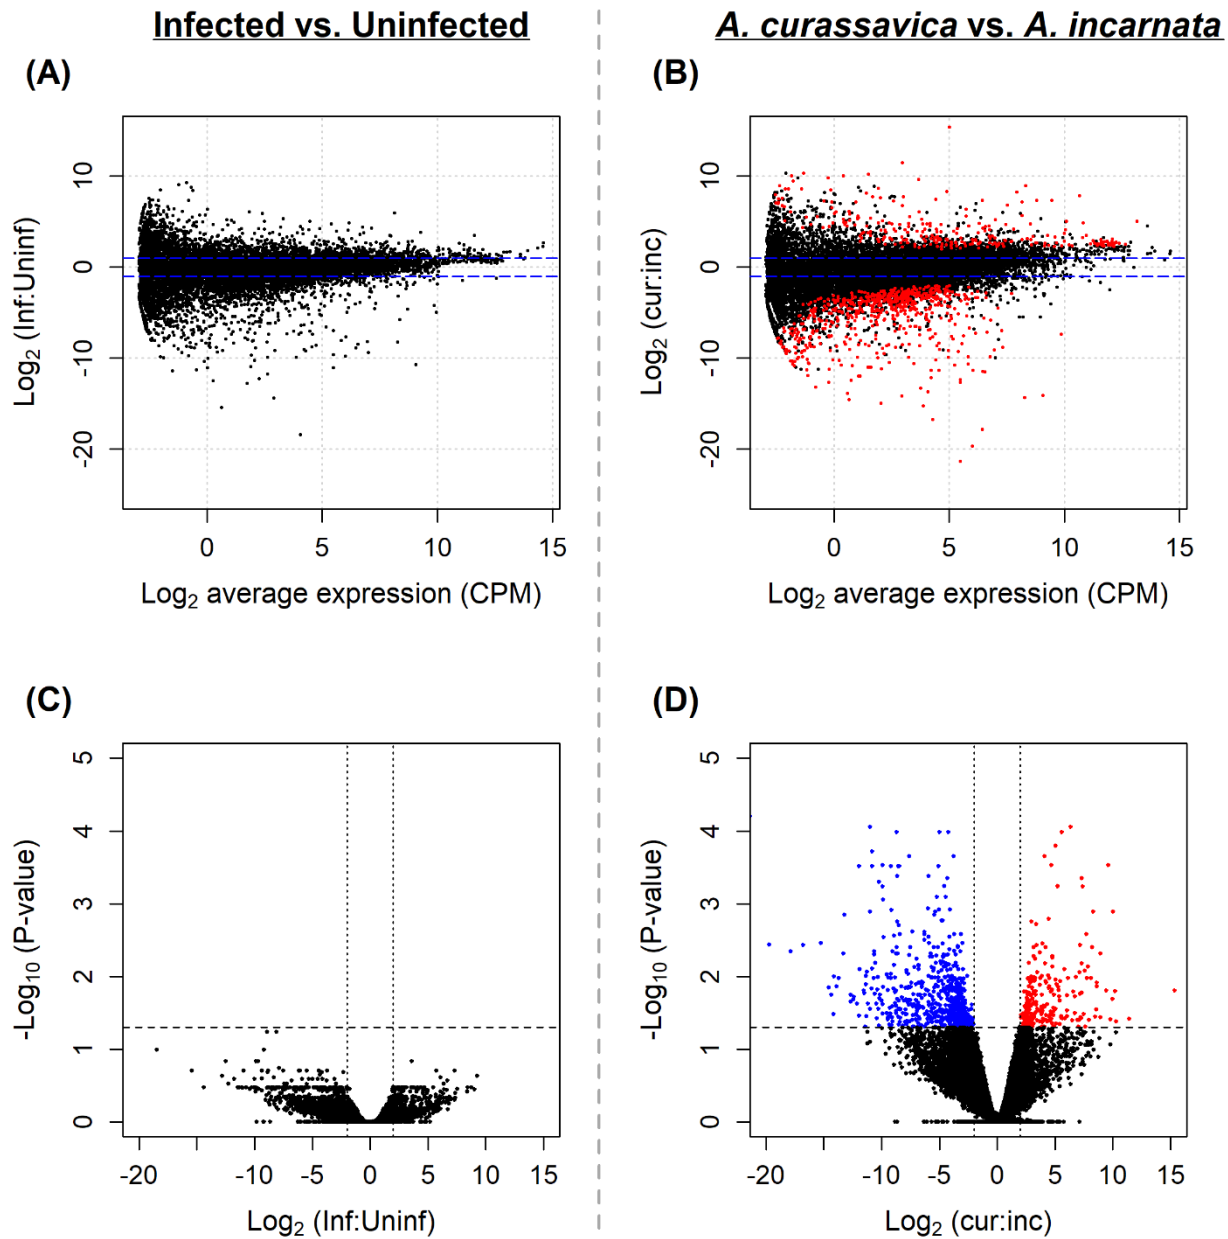

915  
916 **Figure 3.** Patterns of differential gene expression in gut tissue. (A) and (C): expression differences  
917 between infected and uninfected larvae. A positive fold change indicates up-regulation in infected  
918 larvae. (B) and (D): expression differences between larvae fed with *A. curassavica* and *A. incarnata*.  
919 A positive fold change indicates up-regulation in larvae fed with *A. curassavica*. (A) and (B): MA  
920 plots. Dotted horizontal lines indicate  $\pm 1$ -fold change. (C) and (D): volcano plots. Dotted  
921 horizontal lines indicate p-value thresholds. Dotted vertical lines indicate  $\pm 2$ -fold change. Blue  
922 dots represent significantly down-regulated genes; red dots represent significantly up-regulated  
923 genes.

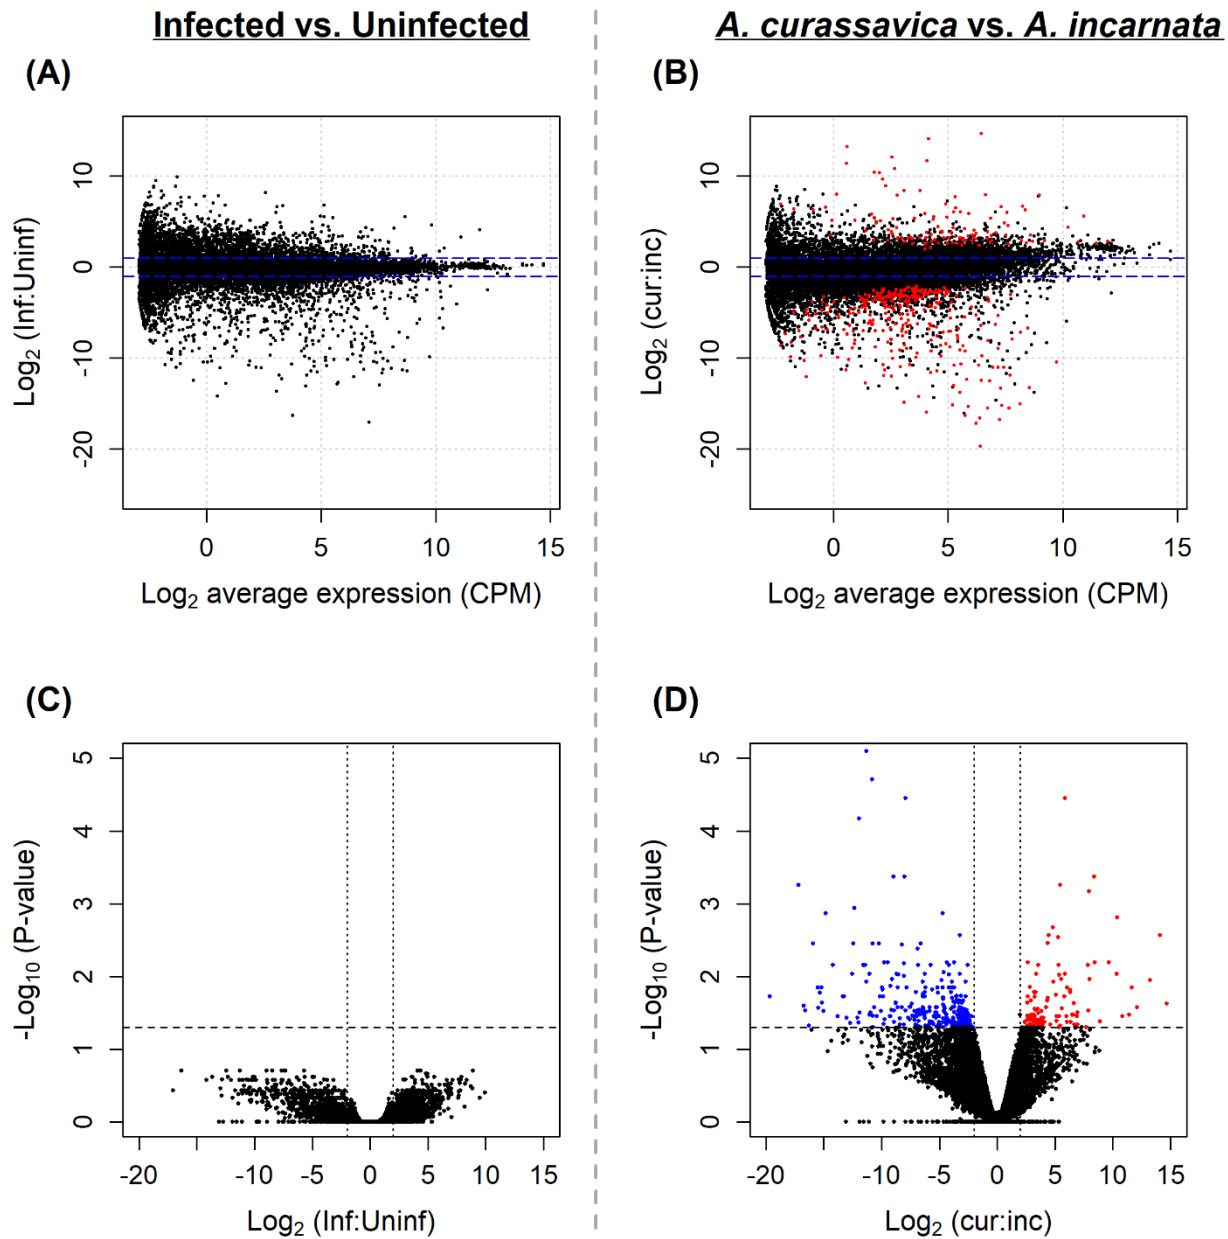

924  
925 **Figure 4.** Patterns of differential gene expression in body tissue. (A) and (C): expression  
926 differences between infected and uninfected larvae. A positive fold change indicates up-regulation  
927 in infected larvae. (B) and (D): expression differences between larvae fed with *A. curassavica* and  
928 *A. incarnata*. A positive fold change indicates up-regulation in larvae fed with *A. curassavica*. (A)  
929 and (B): MA plots. Dotted horizontal lines indicate  $\pm 1$ -fold change. (C) and (D): volcano plots.  
930 Dotted horizontal lines indicate p-value thresholds. Dotted vertical lines indicate  $\pm 2$ -fold change.  
931 Blue dots represent significantly down-regulated genes; red dots represent significantly up-  
932 regulated genes.

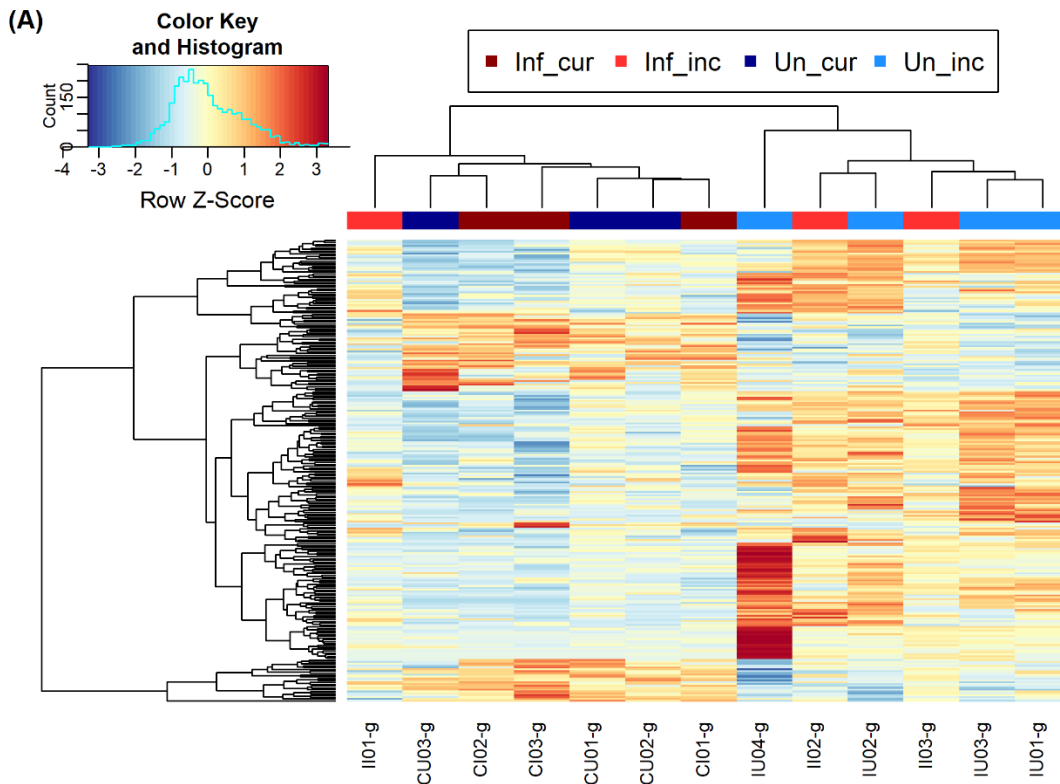

933

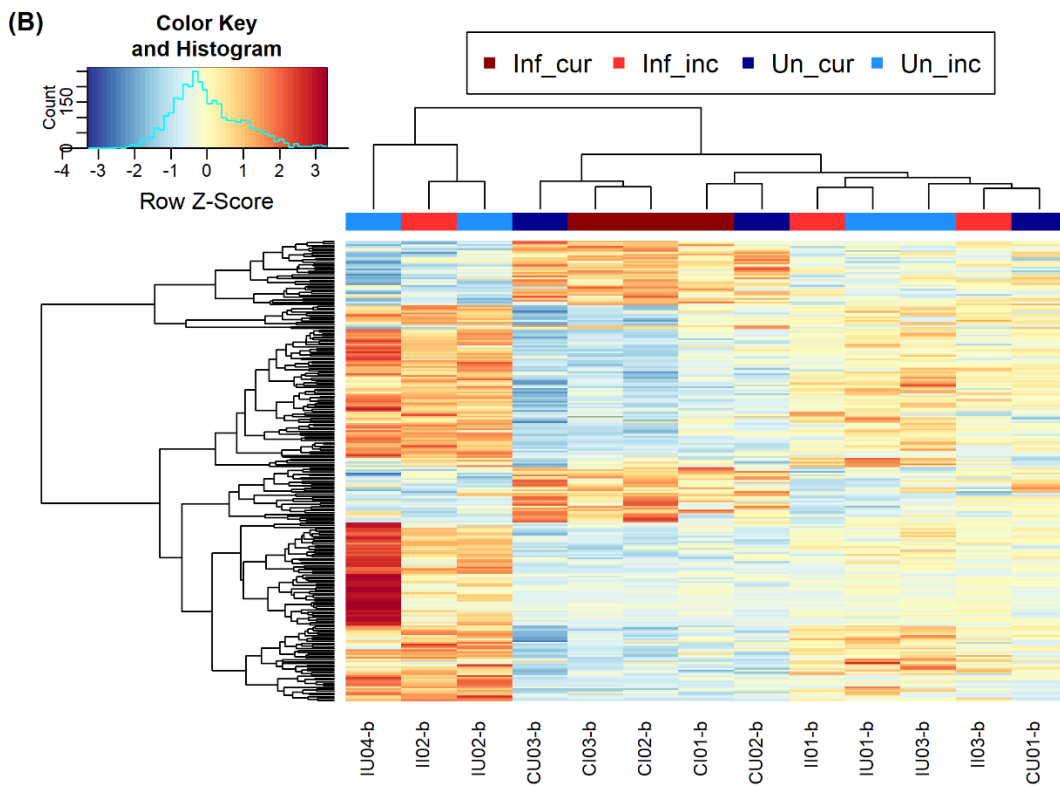

934

935 **Figure 5.** Heatmap and hierarchical clustering of the top 250 differentially expressed genes  
936 between larvae fed with *A. curassavica* and *A. incarnata*. (A) The result of gut samples.  
937 Hierarchical clustering shows that samples are clustered mostly based on the plant species larvae  
938 were fed with. (B) The result of body samples. The clustering patterns are less clear. “Inf\_cur”  
939 represents infected larvae fed with *A. curassavica*; “Inf\_inc” represents infected larvae fed with *A.*  
940 *incarnata*; “Un\_cur” represents uninfected larvae fed with *A. curassavica*; “Un\_inc” represents  
941 uninfected larvae fed with *A. incarnata*.

(A)

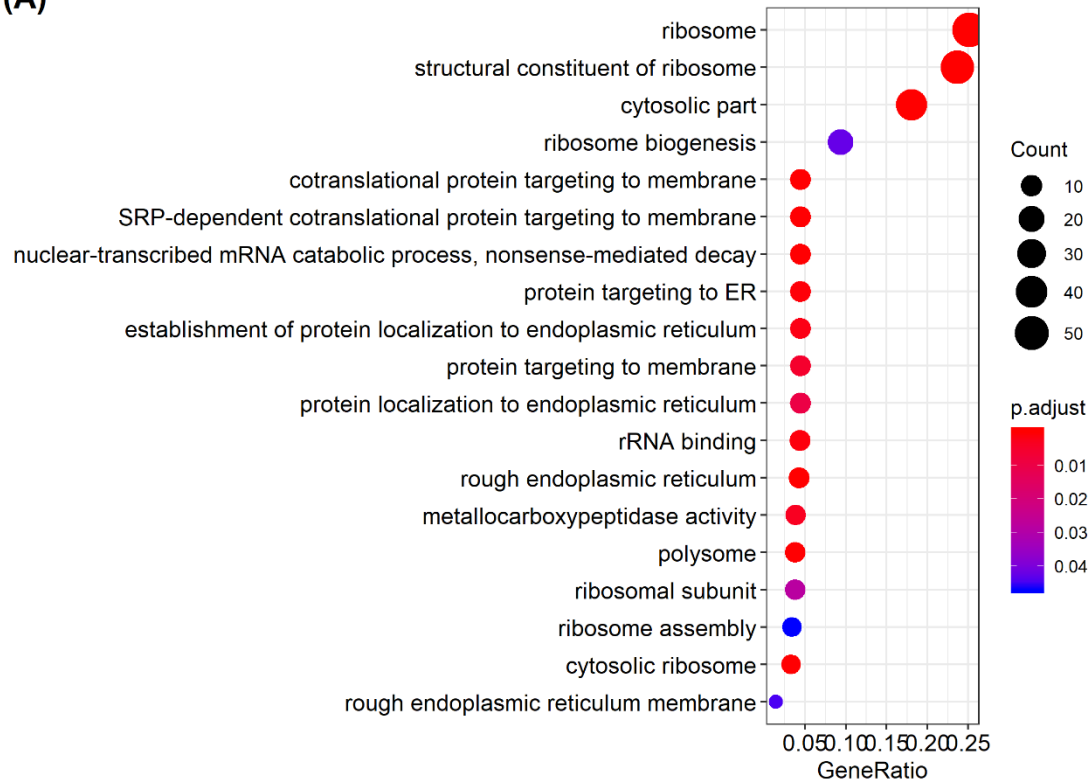

(B)

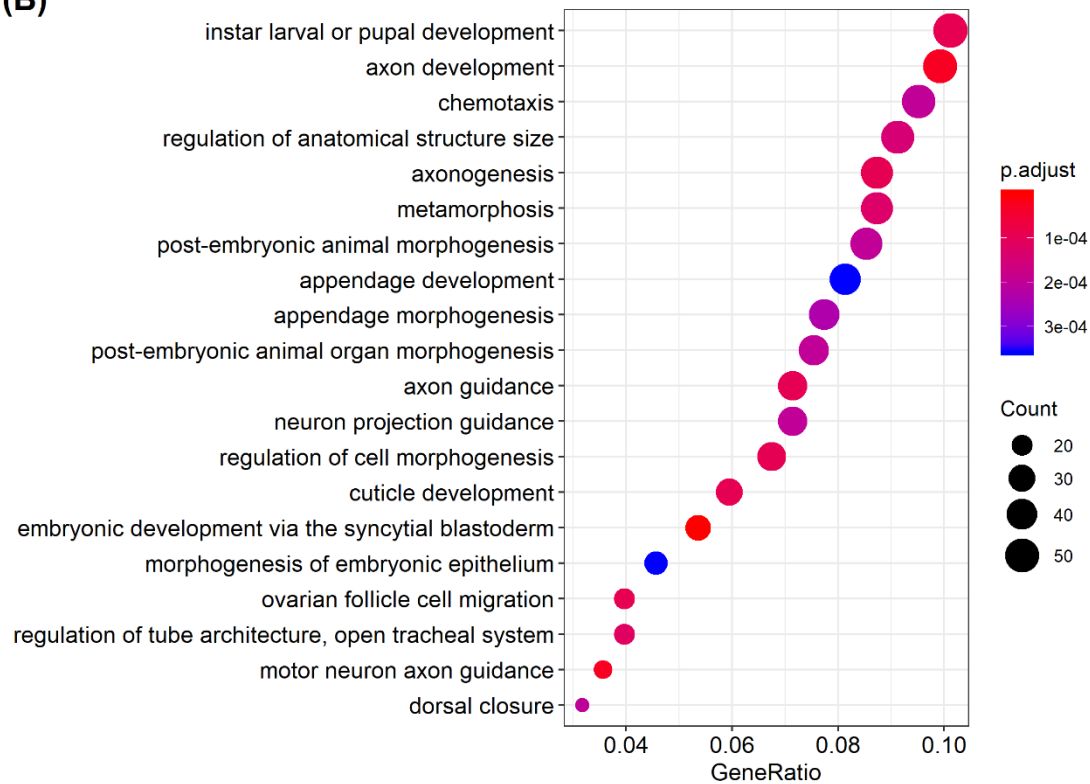

943 **Figure 6.** Significantly functionally enriched GO terms in gut tissue between larvae fed with *A.*  
944 *curassavica* and *A. incarnata*. (A) 19 significant terms in up-regulated genes in *A. curassavica*. (B)  
945 116 significant terms in up-regulated genes in *A. incarnata*. Only the top 20 were shown. The x-  
946 axis represents the proportion of genes that belong to a given functional category to the total  
947 number of differentially expressed genes. All three ontology terms (BP, MF, CC) were included.  
948 BP = biological process, MF = molecular function, CC = cellular component. P-values were  
949 corrected using the Benjamini-Hochberg method.



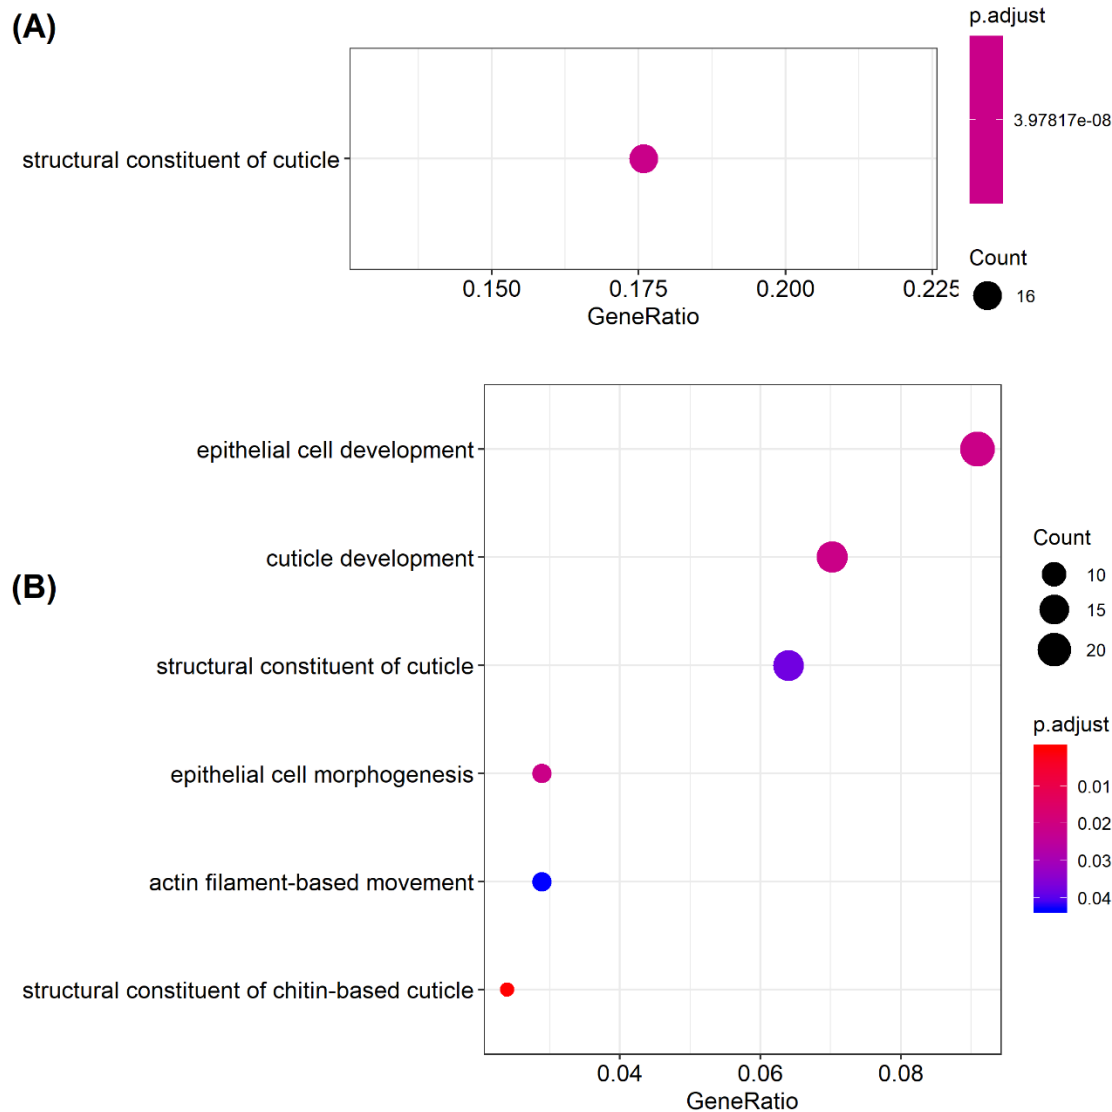

950  
951 **Figure 7.** Significantly functionally enriched GO terms in body tissue between larvae fed with *A.*  
952 *curassavica* and *A. incarnata*. (A) One significant term in up-regulated genes in *A. curassavica*.  
953 (B) Six significant terms in up-regulated genes in *A. incarnata*. The x-axis represents the proportion  
954 of genes that belong to a given functional category to the total number of differentially expressed  
955 genes. All three ontology terms (BP, MF, CC) were included. BP = biological process, MF =  
956 molecular function, CC = cellular component. P-values were corrected using the Benjamini-  
957 Hochberg method.
